# Supplementary material for: Synthesis and evaluation of new polyenic compounds as potential PPARs modulators
Source: Royal Society of Chemistry journal article supplement (doi:10.1039/c2ob25593f), 2012-01-01

## Supporting Information

### Synthesis and Evaluation of New Polyenic Compounds as Potential PPARs modulators

*Dominique Amans,<sup>a</sup> Véronique Bellosta,<sup>a</sup> Catherine Dacquet,<sup>c</sup> Alain Ktorza,<sup>c</sup> Nathalie Hennuyer,<sup>d</sup> Bart Stael,<sup>d</sup> Daniel-Henri Caignard,<sup>b\*</sup> and Janine Cossy<sup>a\*</sup>*

*<sup>a</sup>Laboratoire de Chimie Organique, ESPCI, CNRS, 10 rue Vauquelin 75231-PARIS Cedex 05, France. <sup>b</sup>Experimental Science Division Institut de Recherches Servier, 11 Rue des Moulineaux, 92150 Suresnes, France. <sup>c</sup>Division of Metabolic Disease Research, Institut de Recherches Servier, 11 Rue des Moulineaux, 92150 Suresnes, France. <sup>d</sup>Université Lille Nord de France, F-59000, Lille, France; Inserm, U1011, F-59000, Lille, France, Institut Pasteur de Lille, F-59019 Lille, France.*

#### Table of contents

|                                                               |   |
|---------------------------------------------------------------|---|
| Copies of the <sup>1</sup> H and <sup>13</sup> C spectra..... | 2 |
|---------------------------------------------------------------|---|

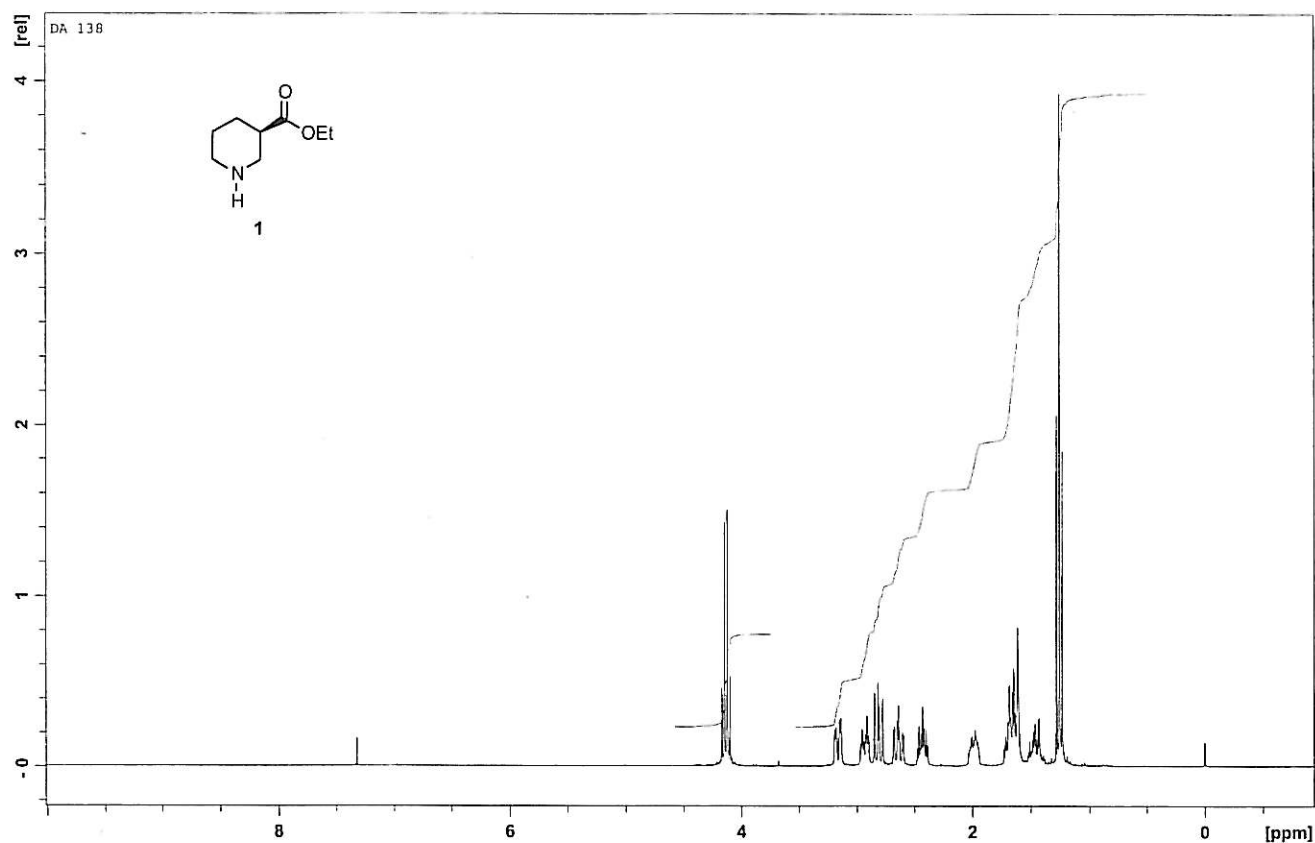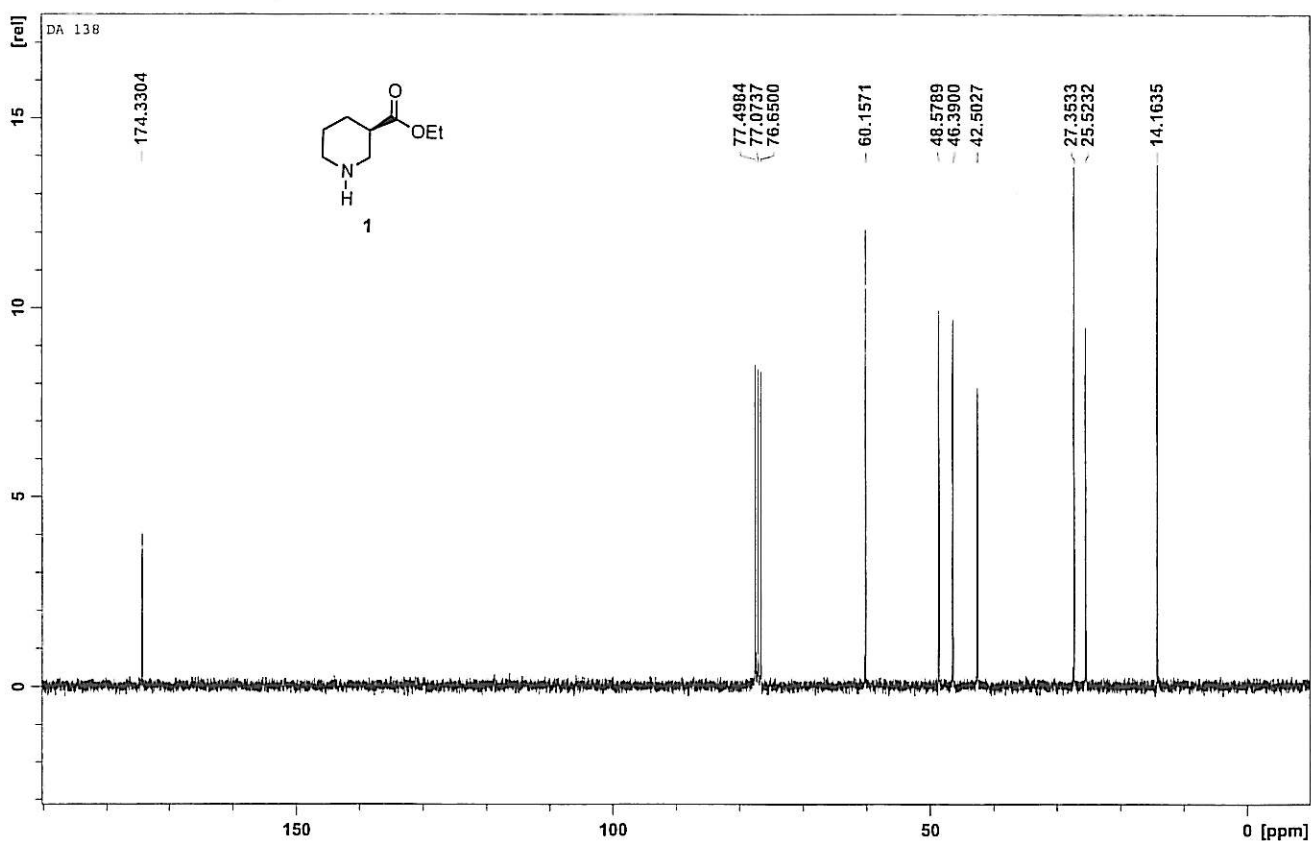

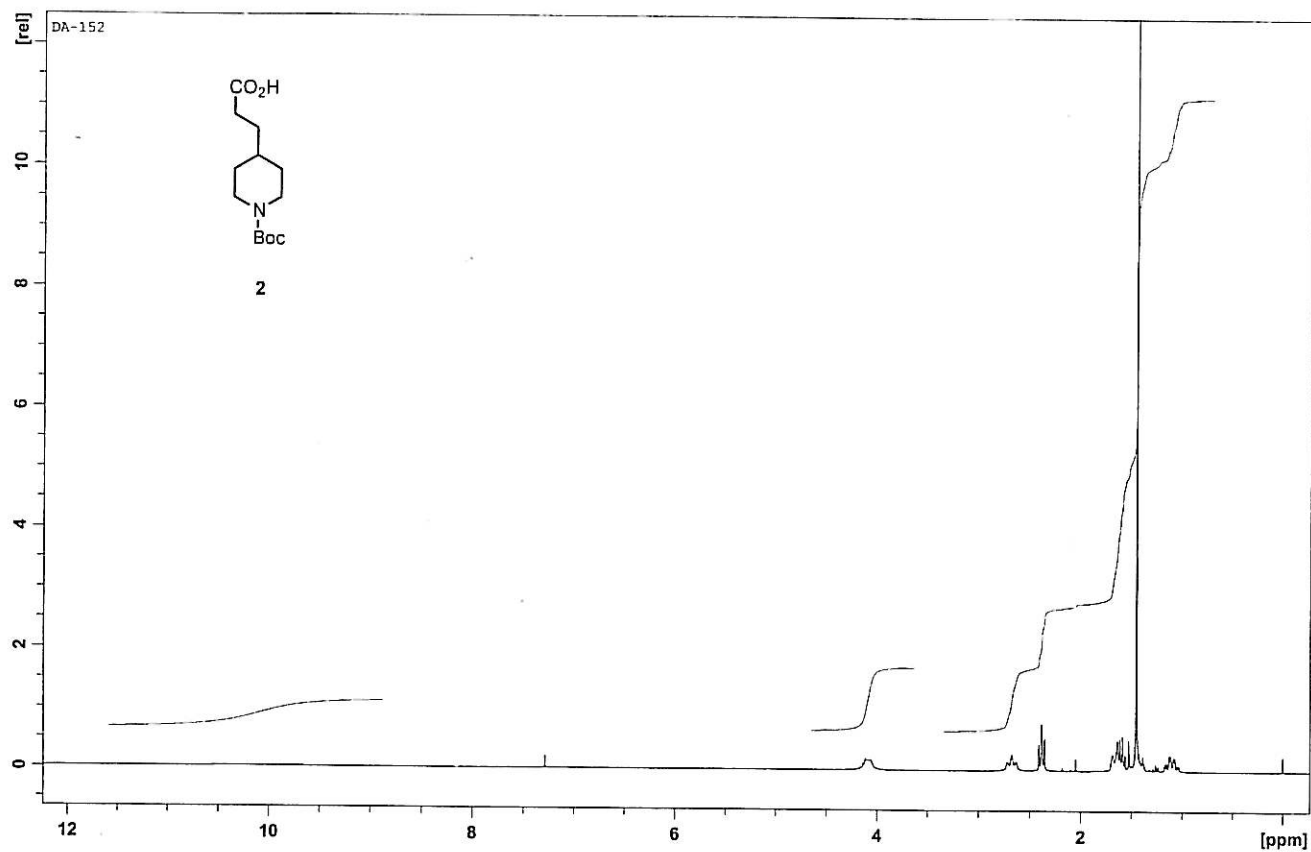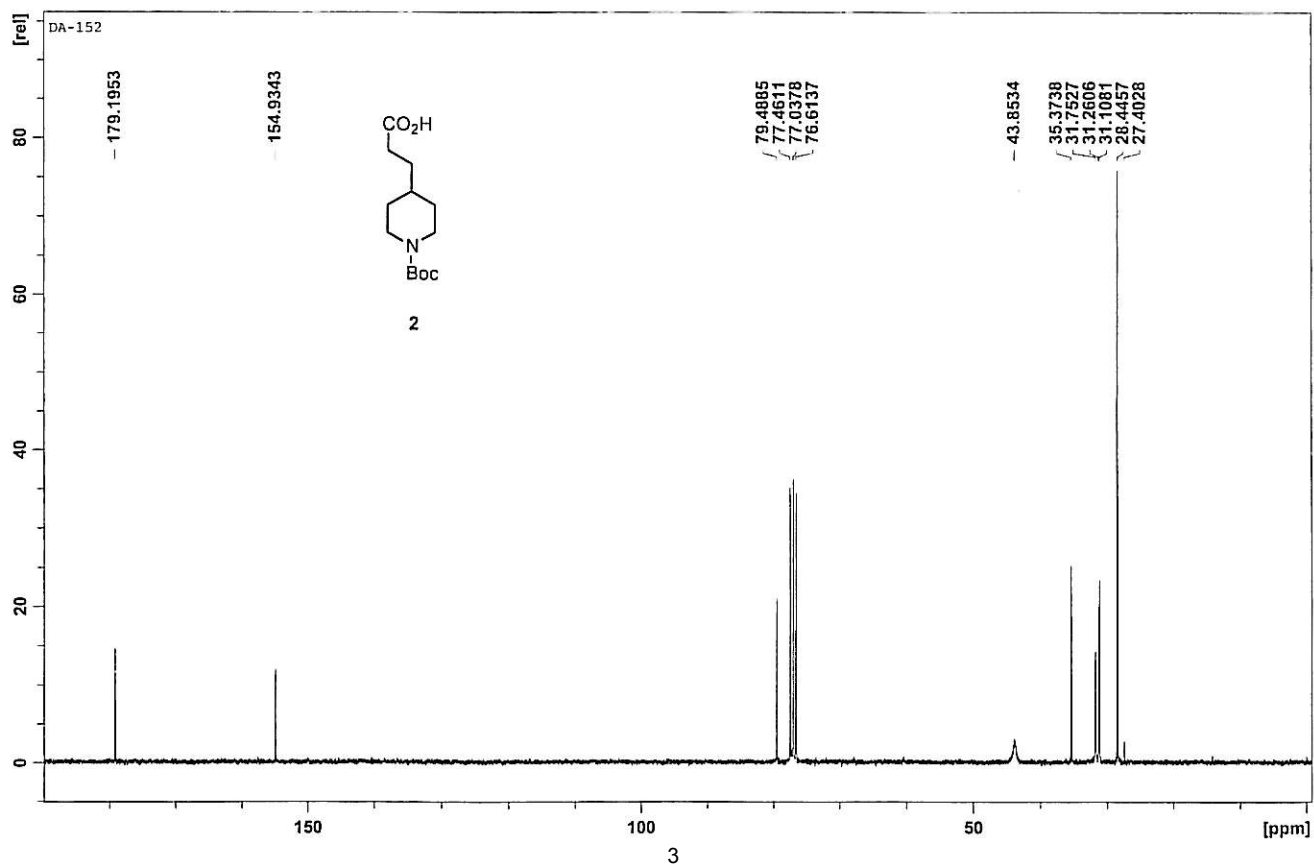

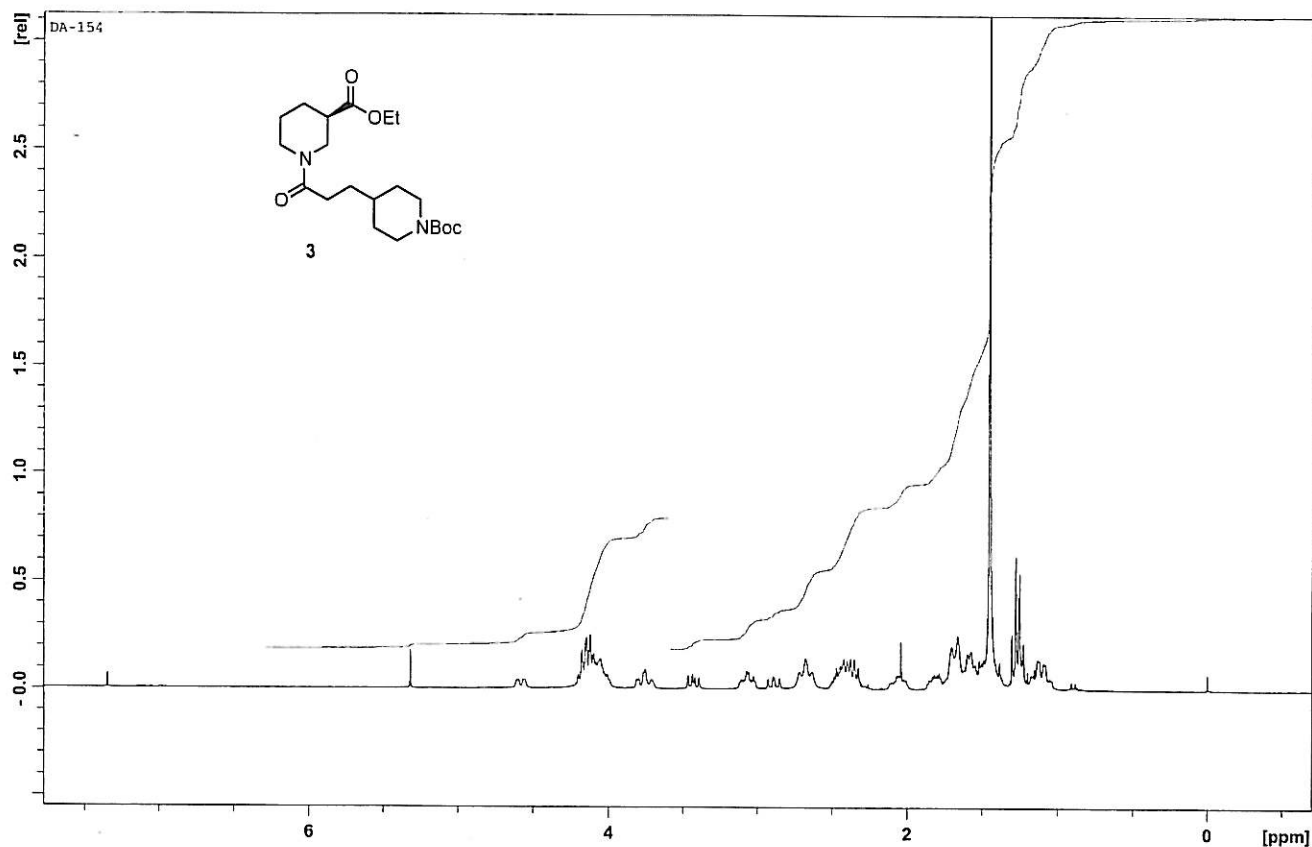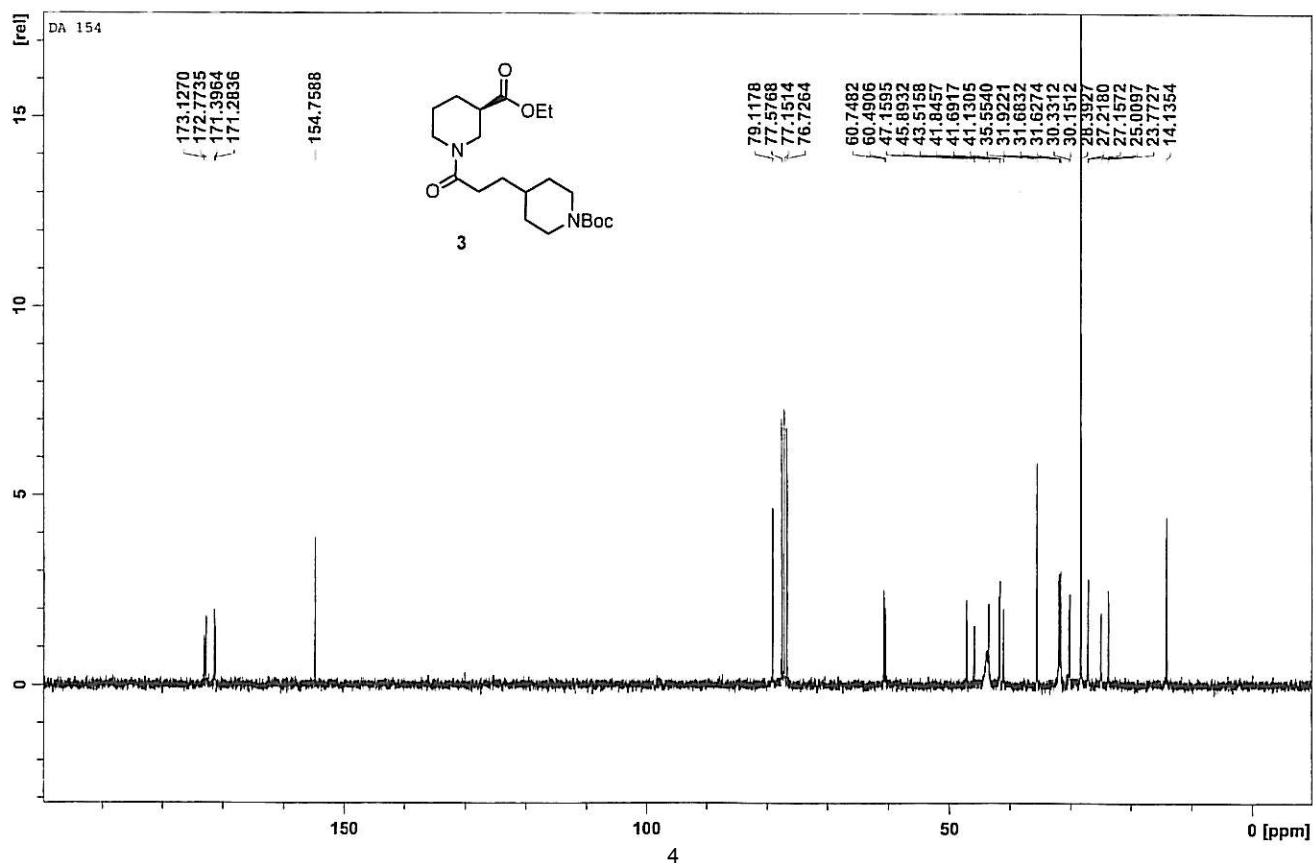

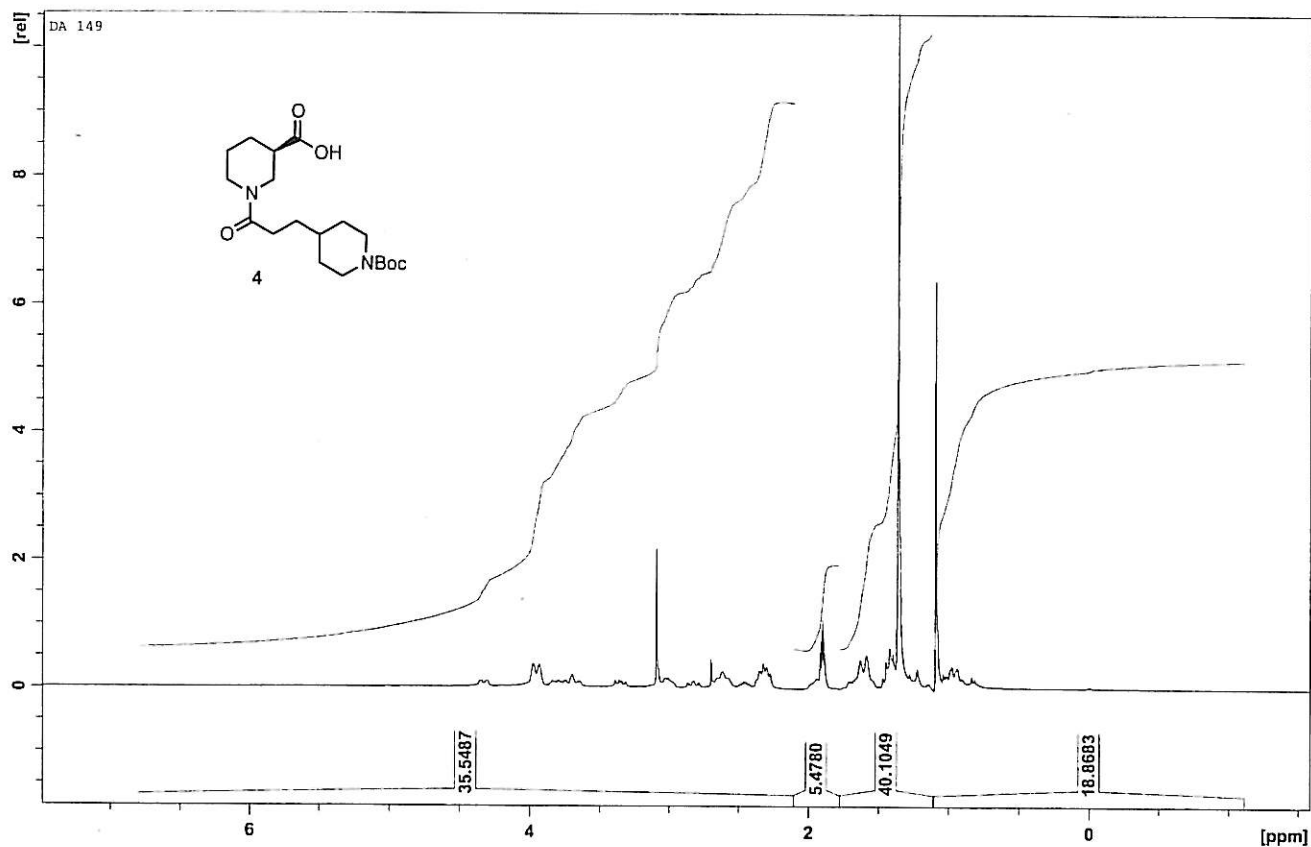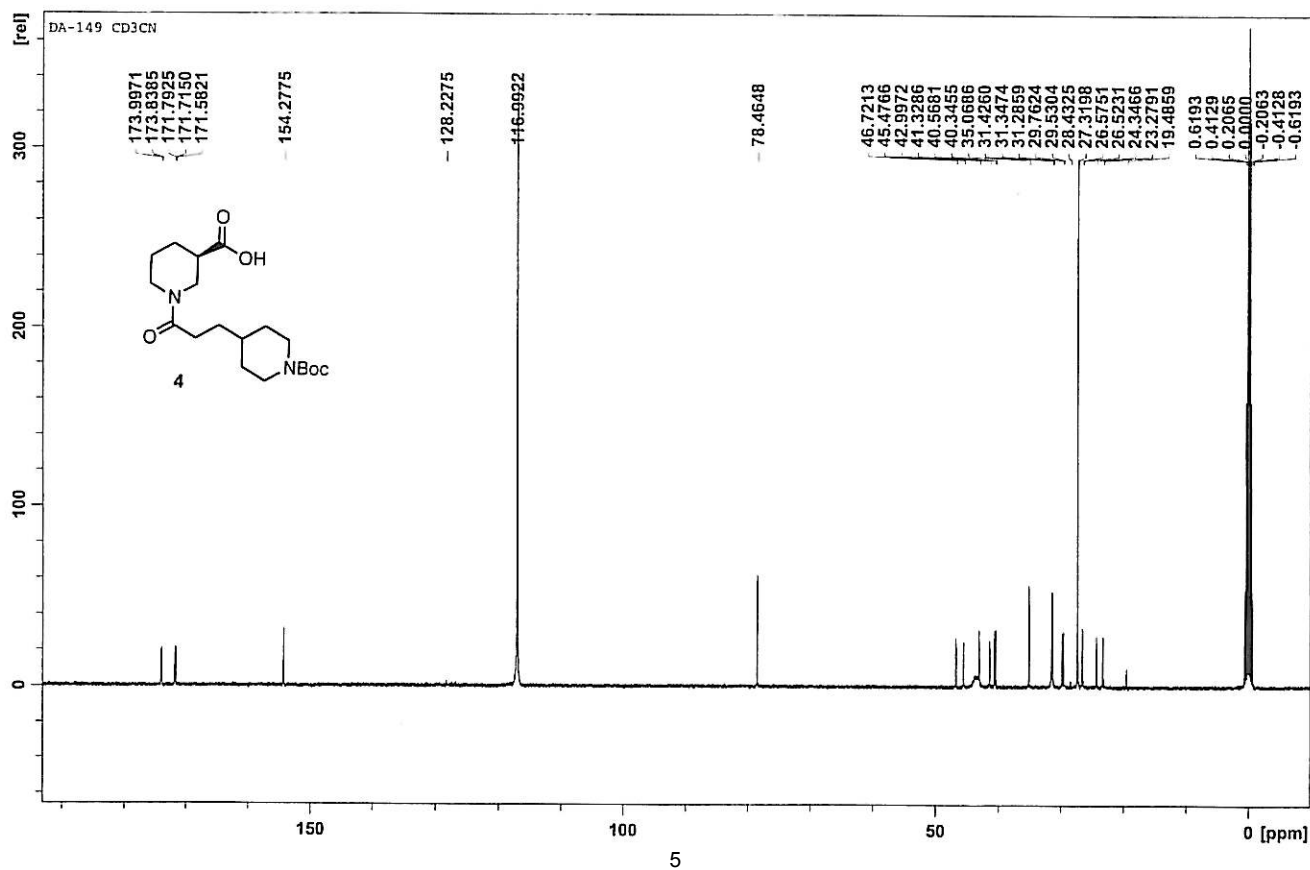

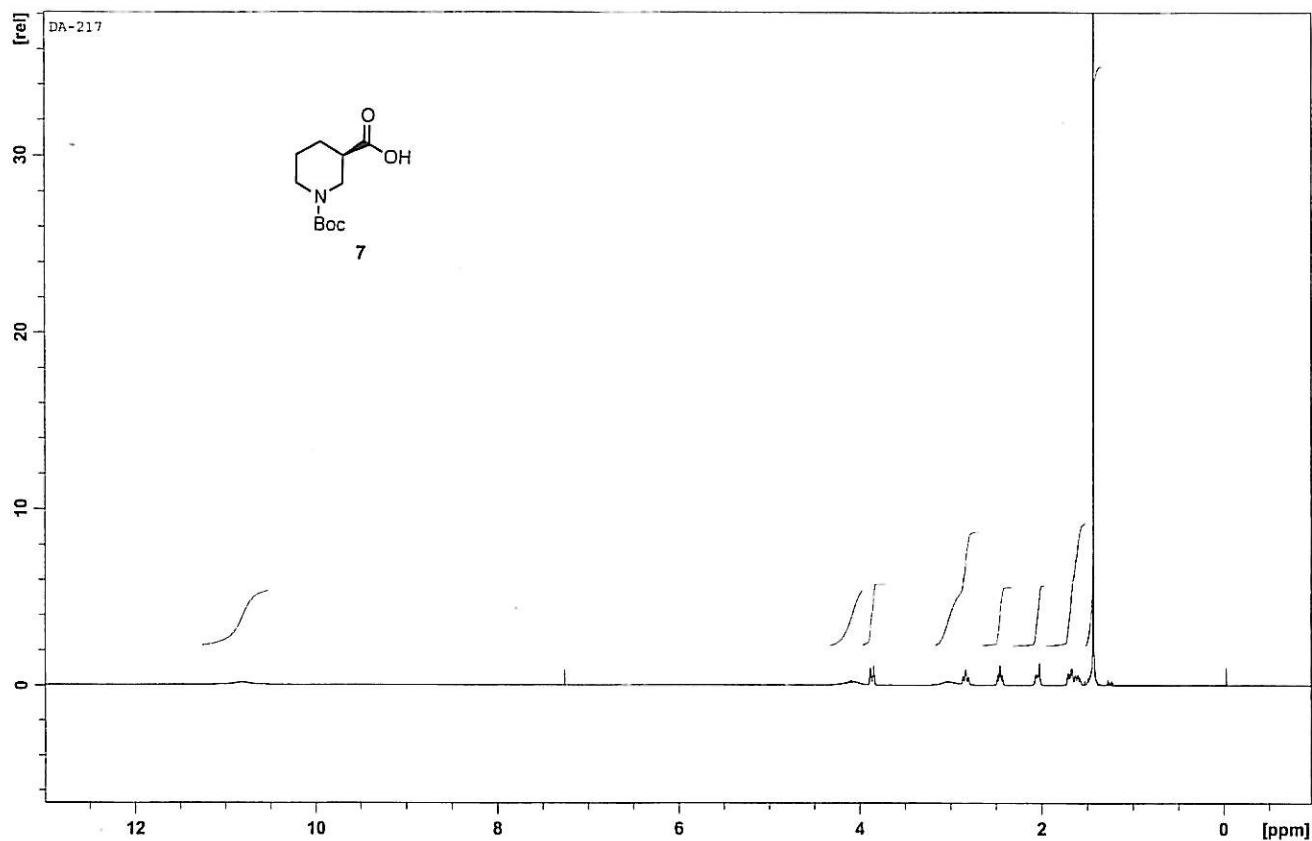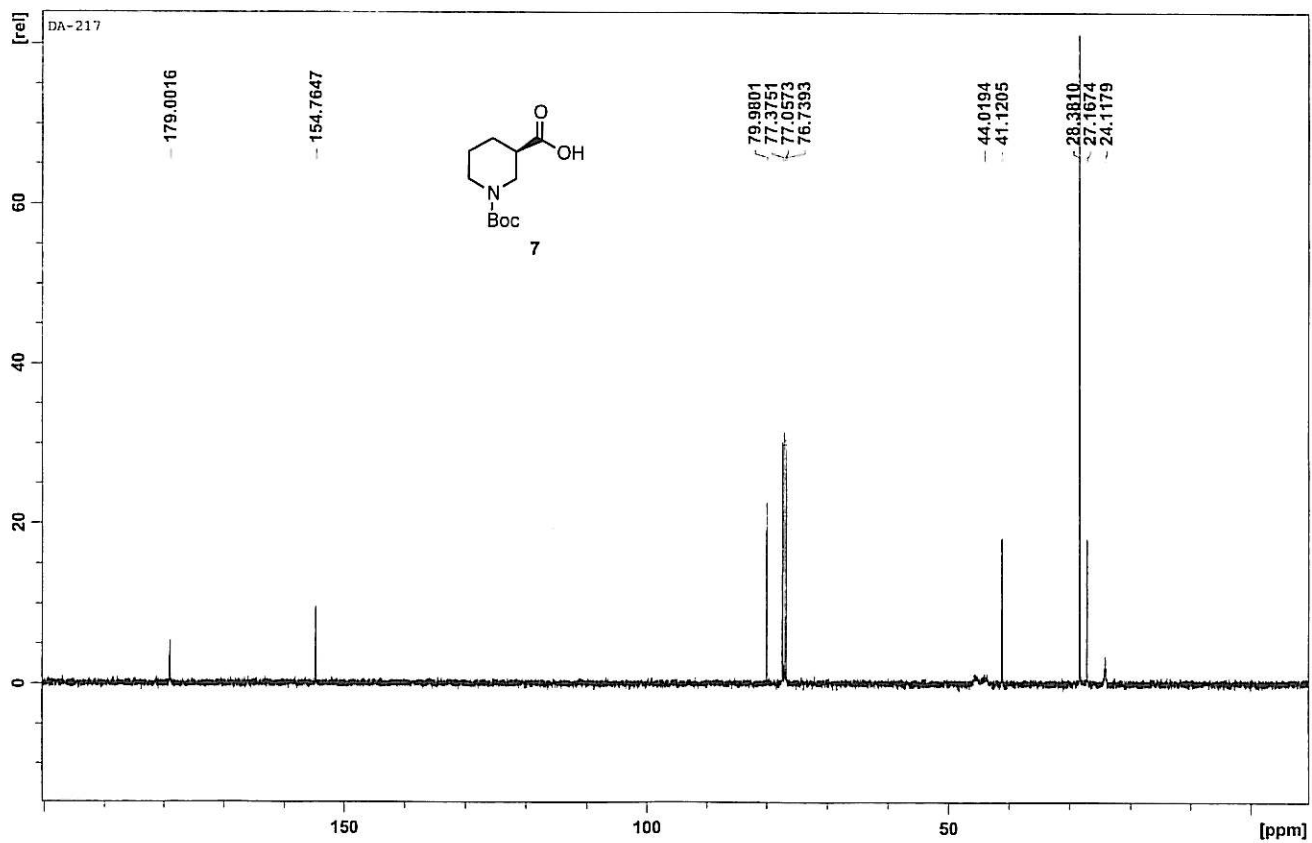

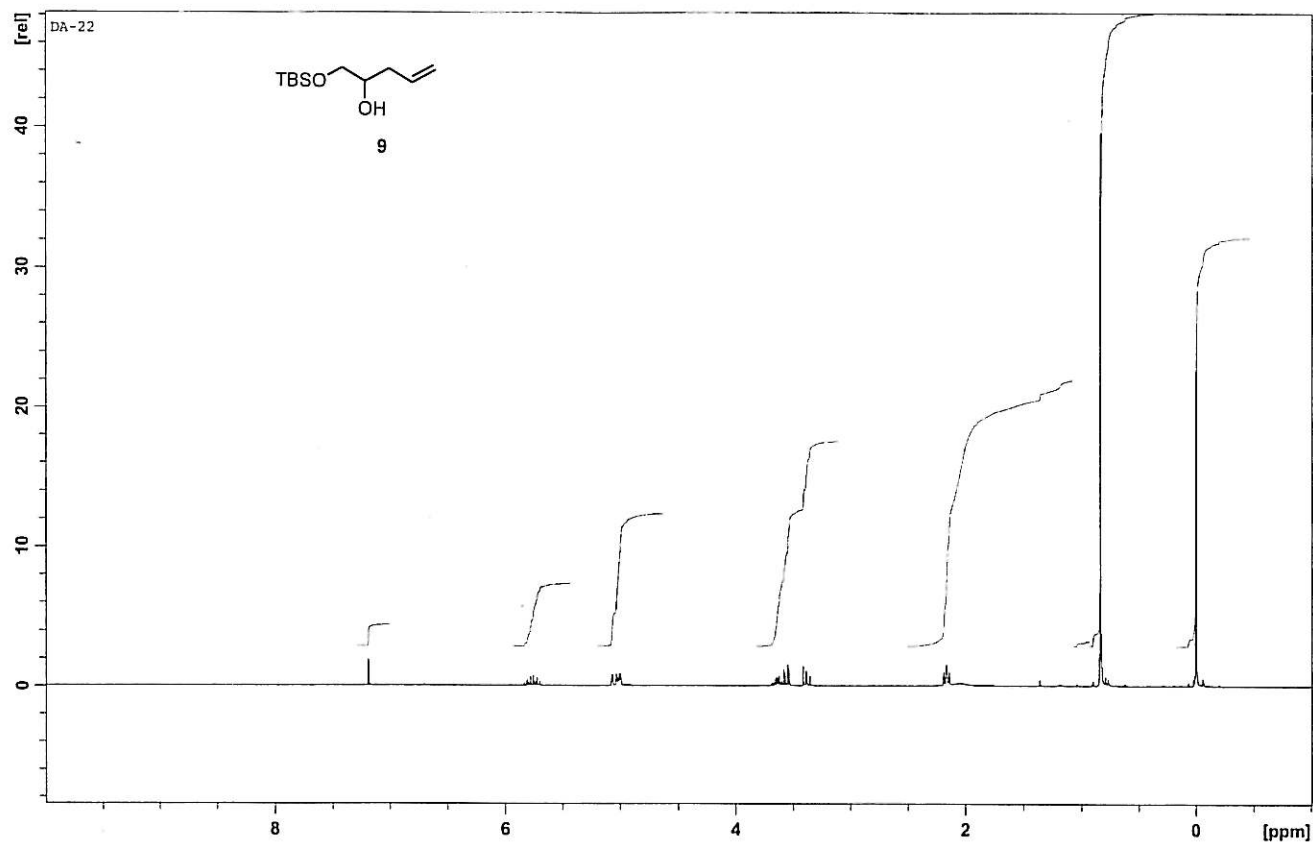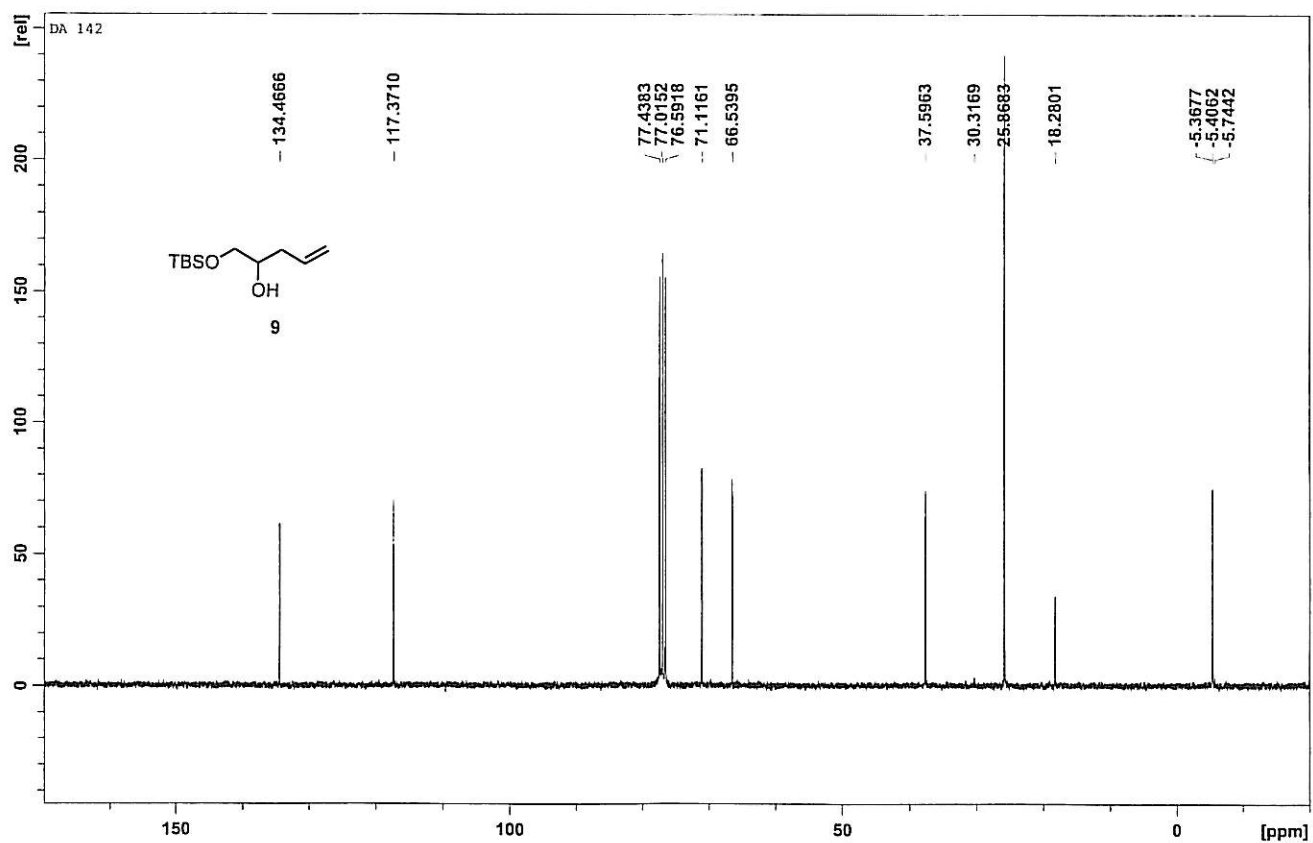





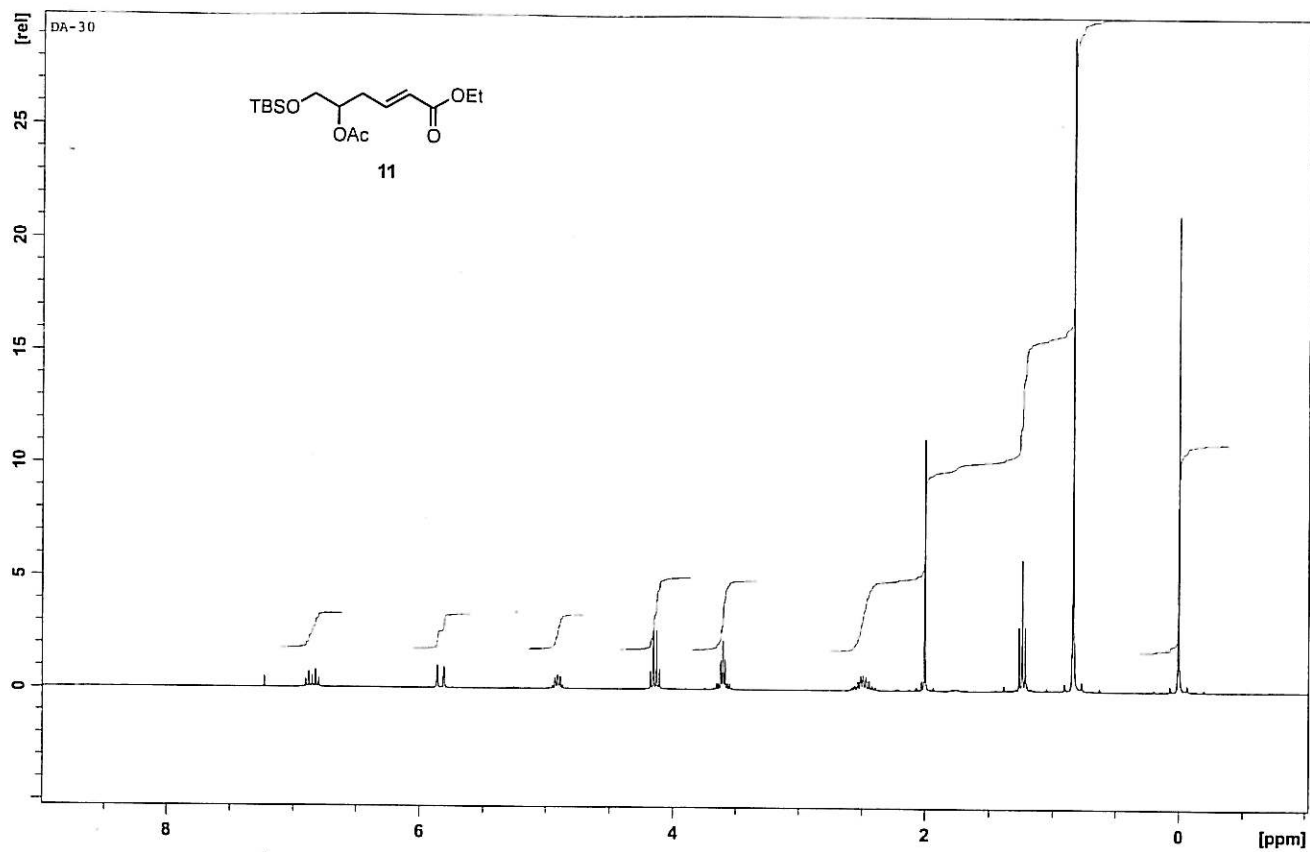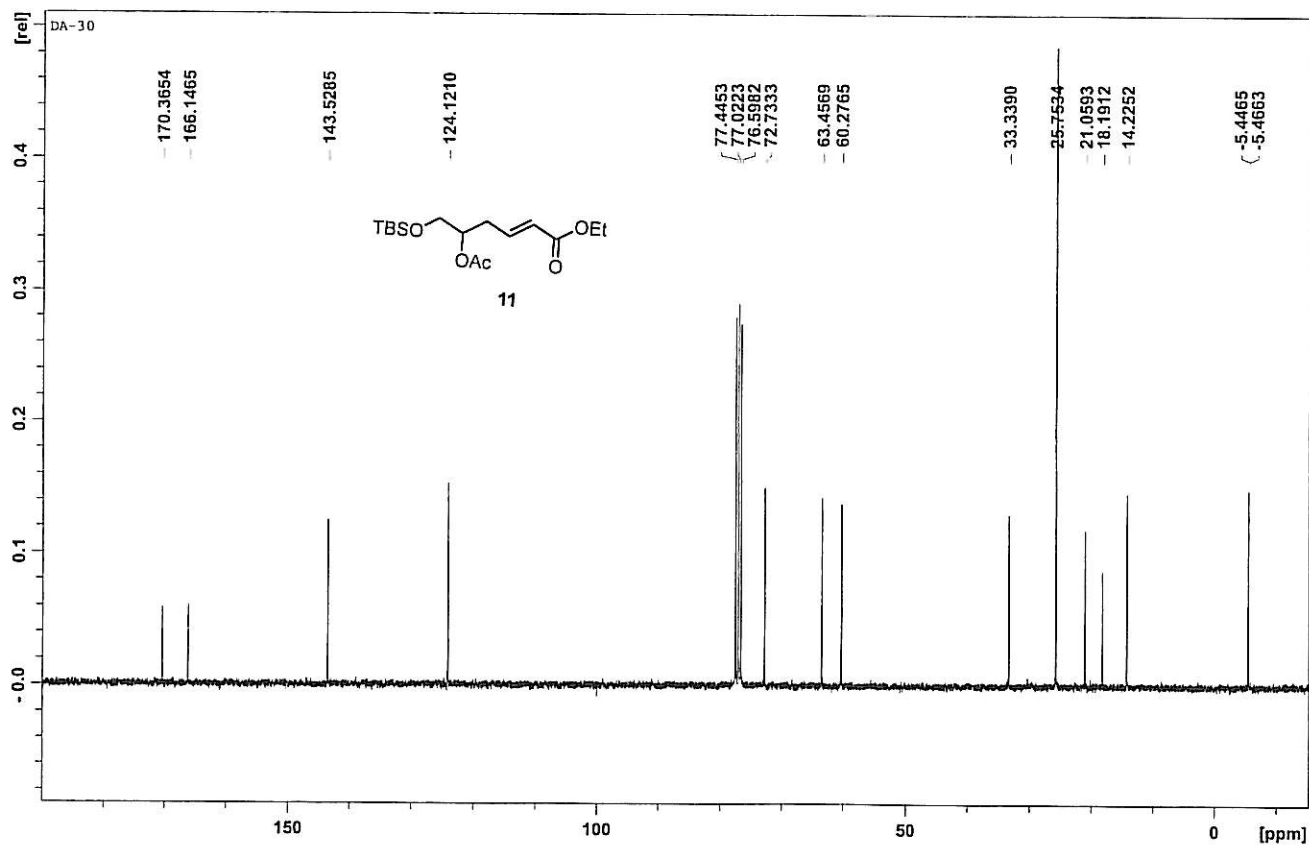

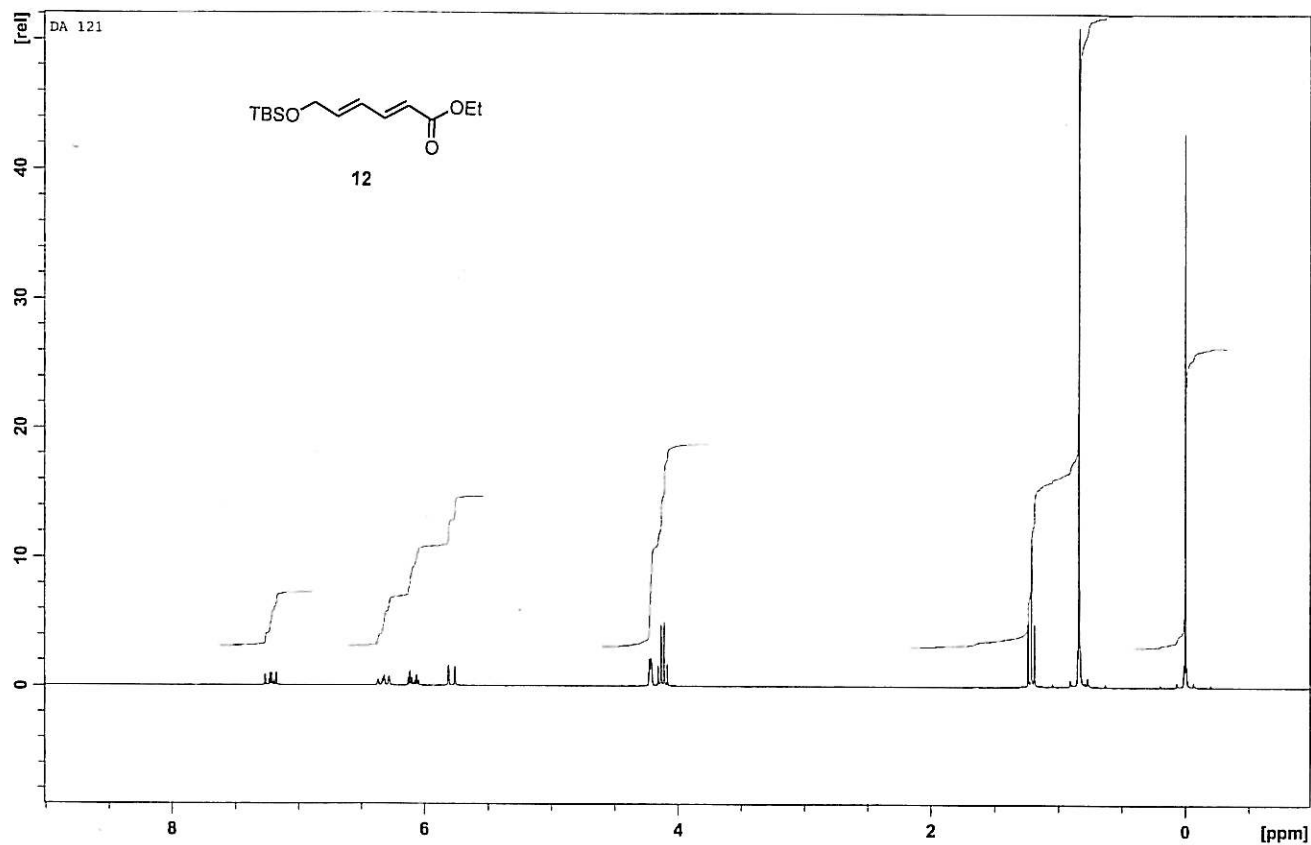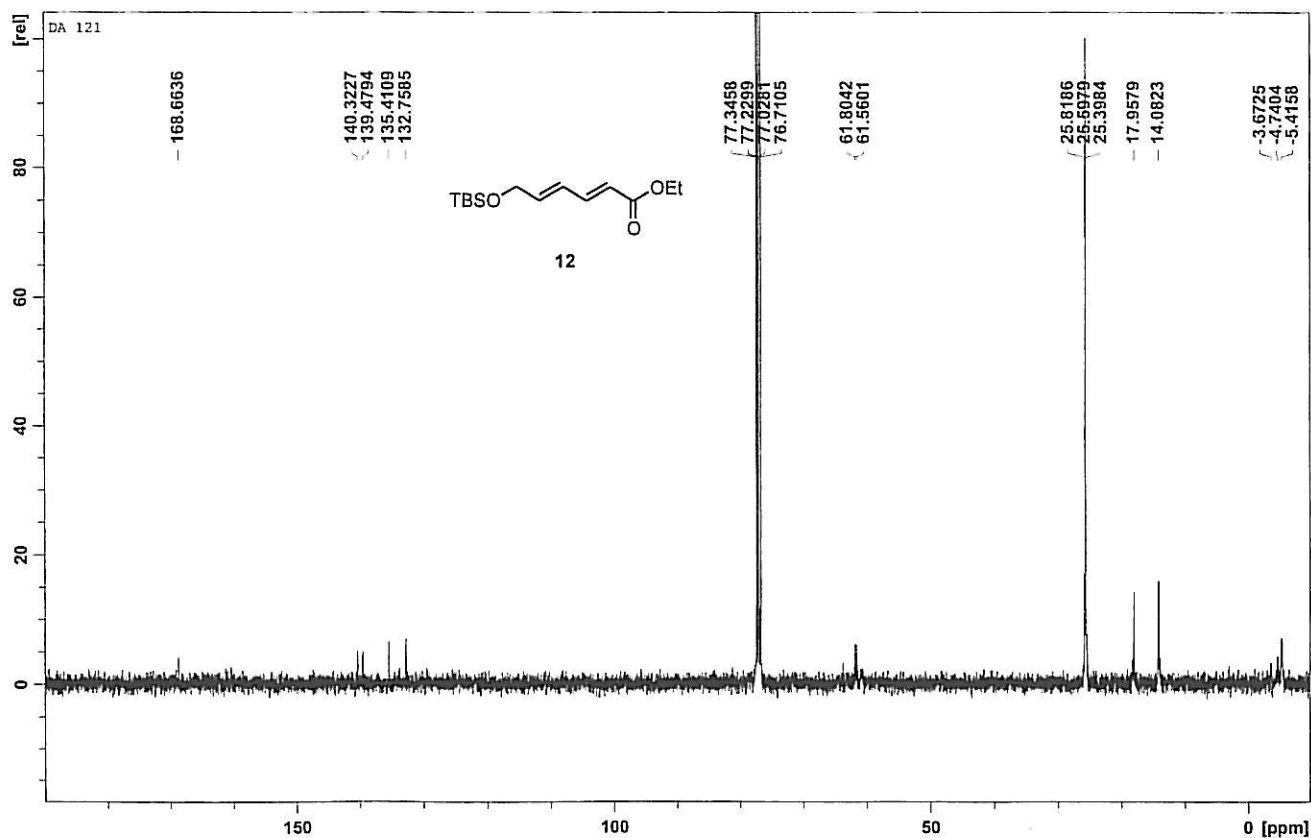

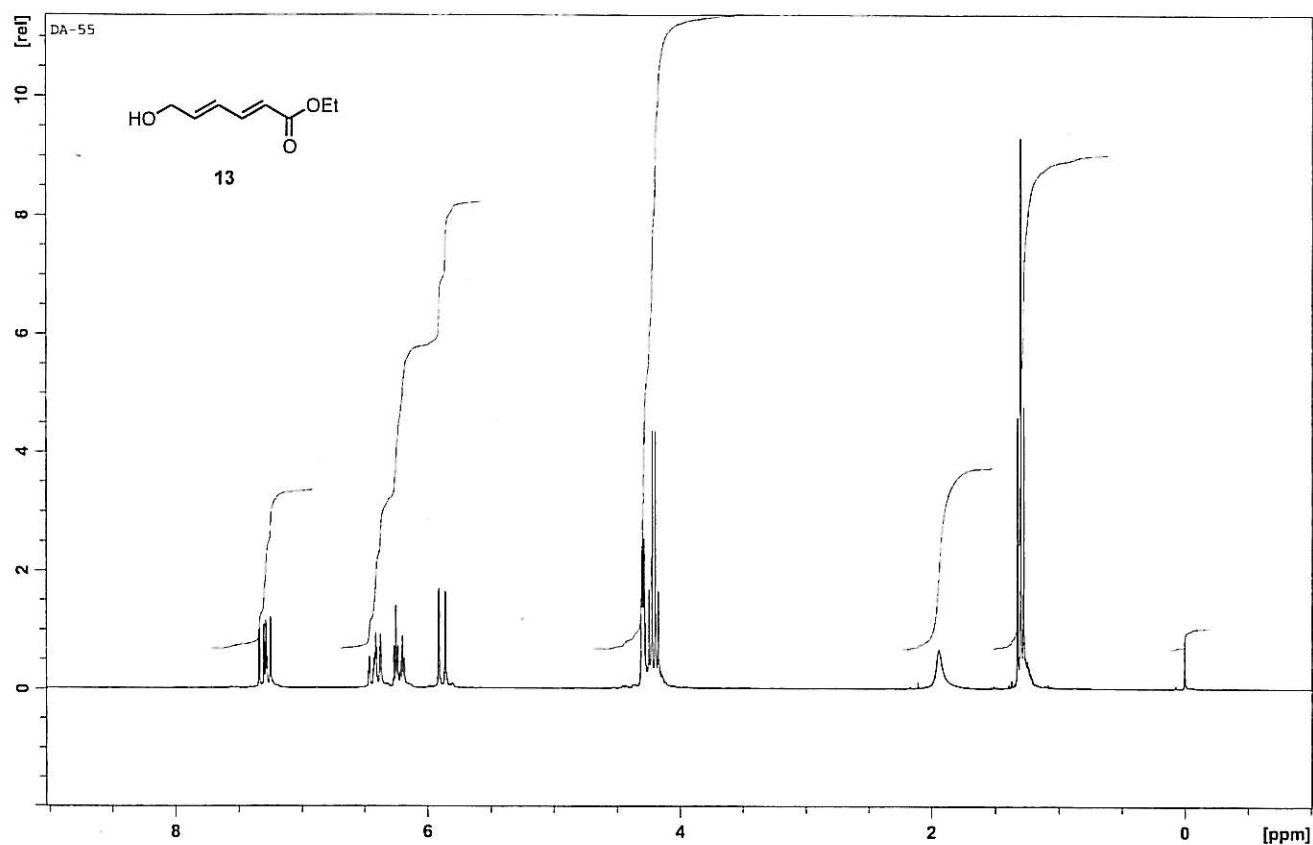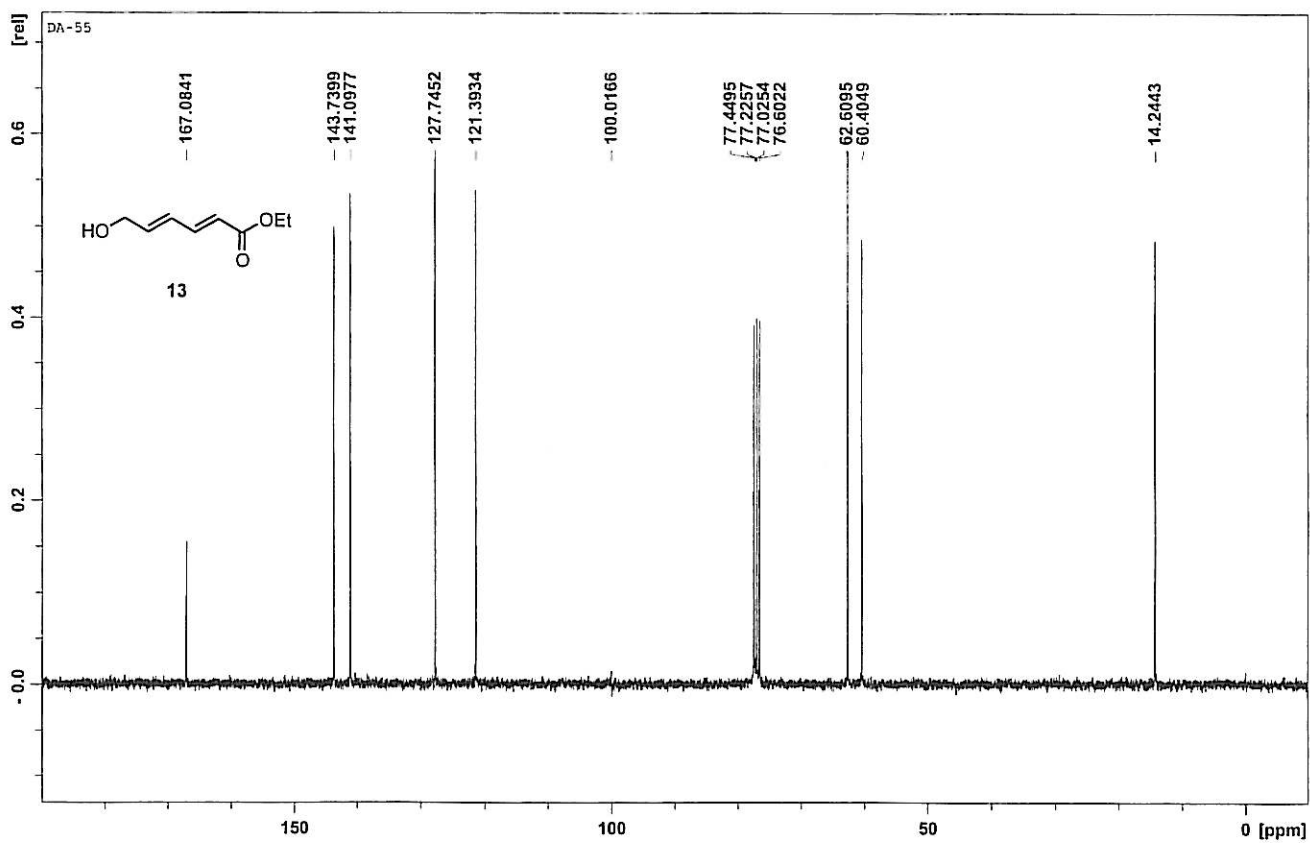

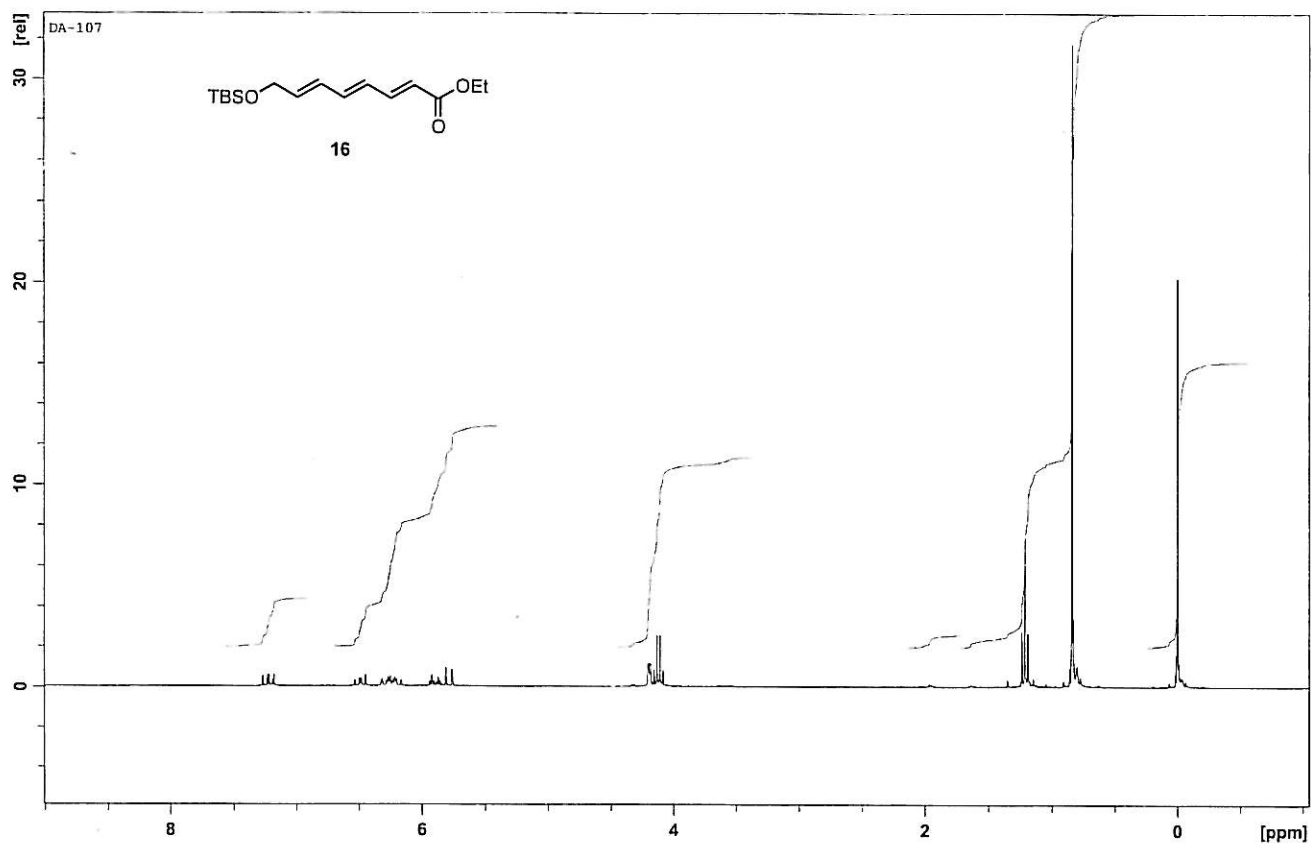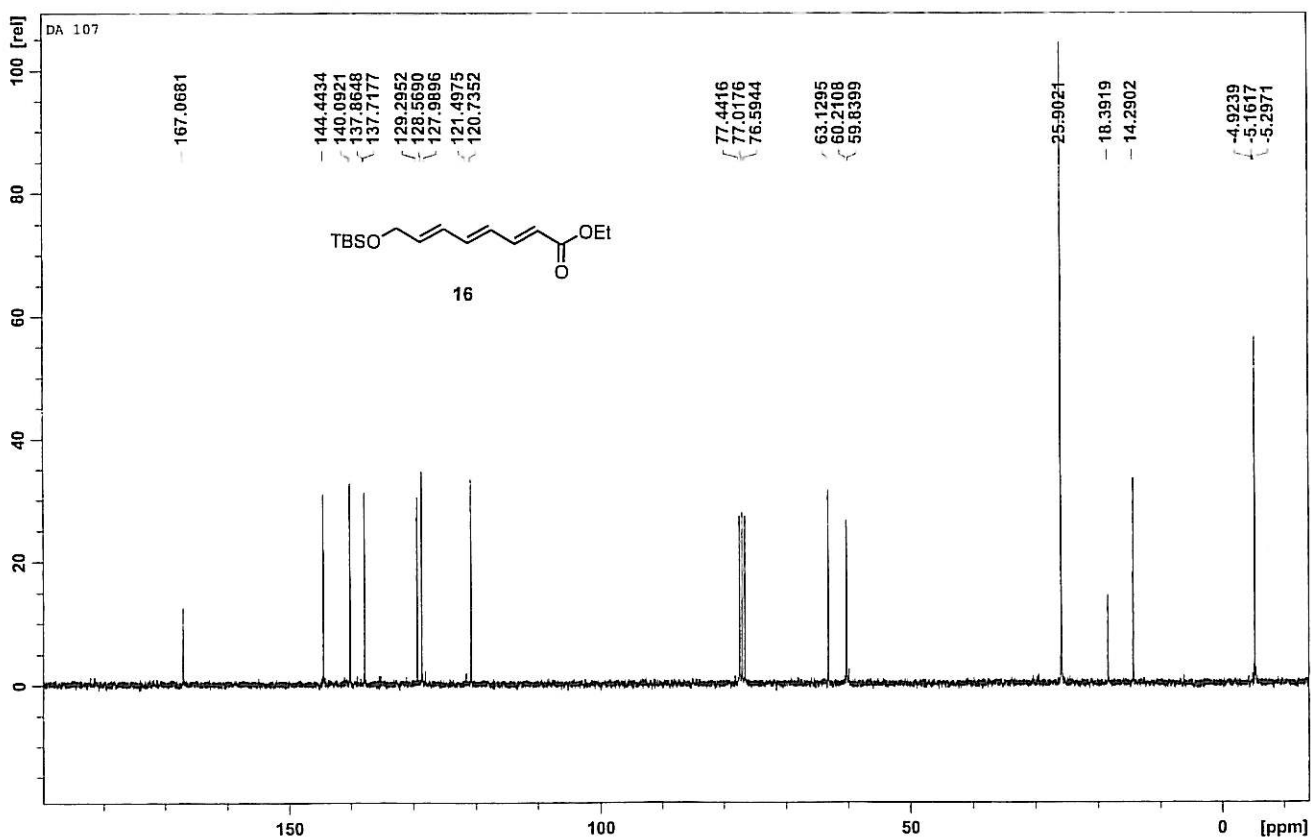

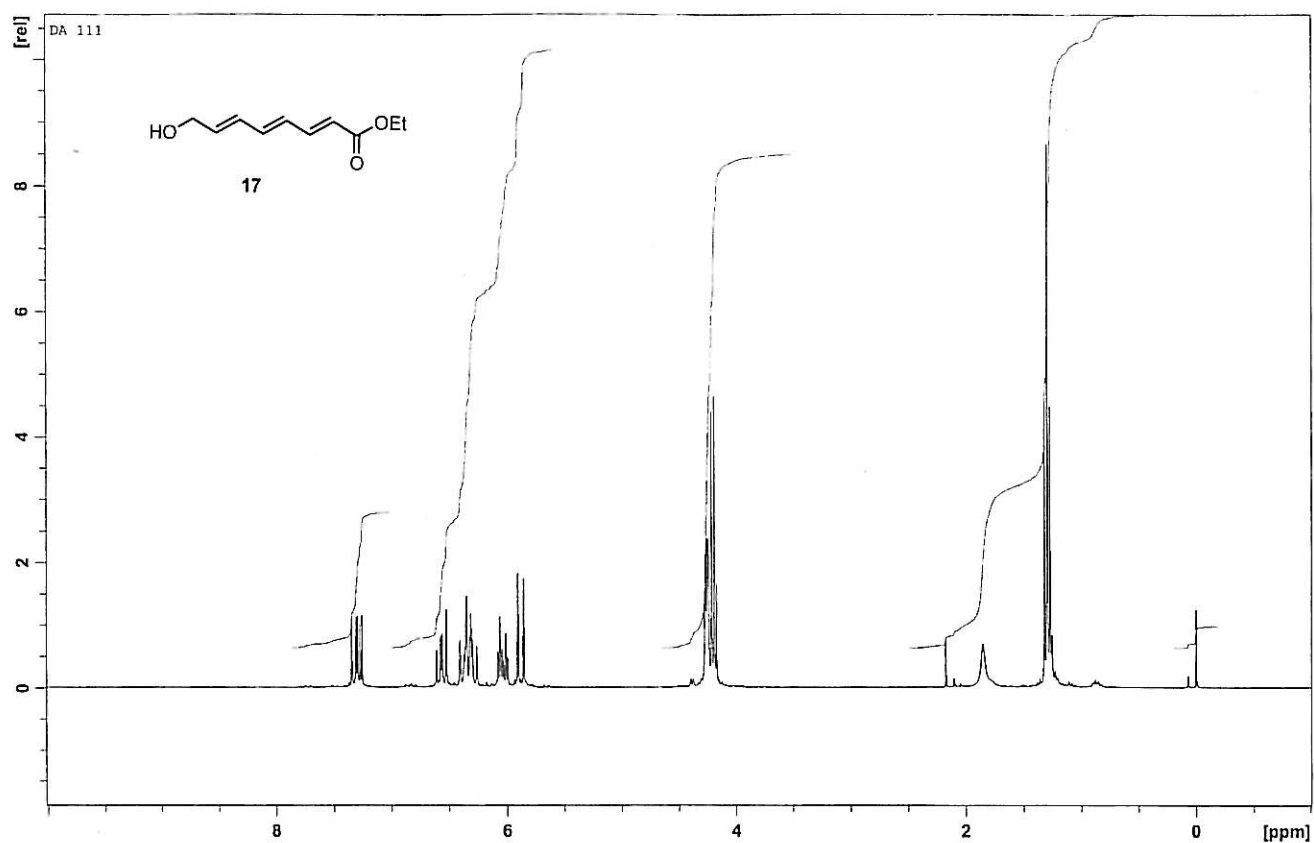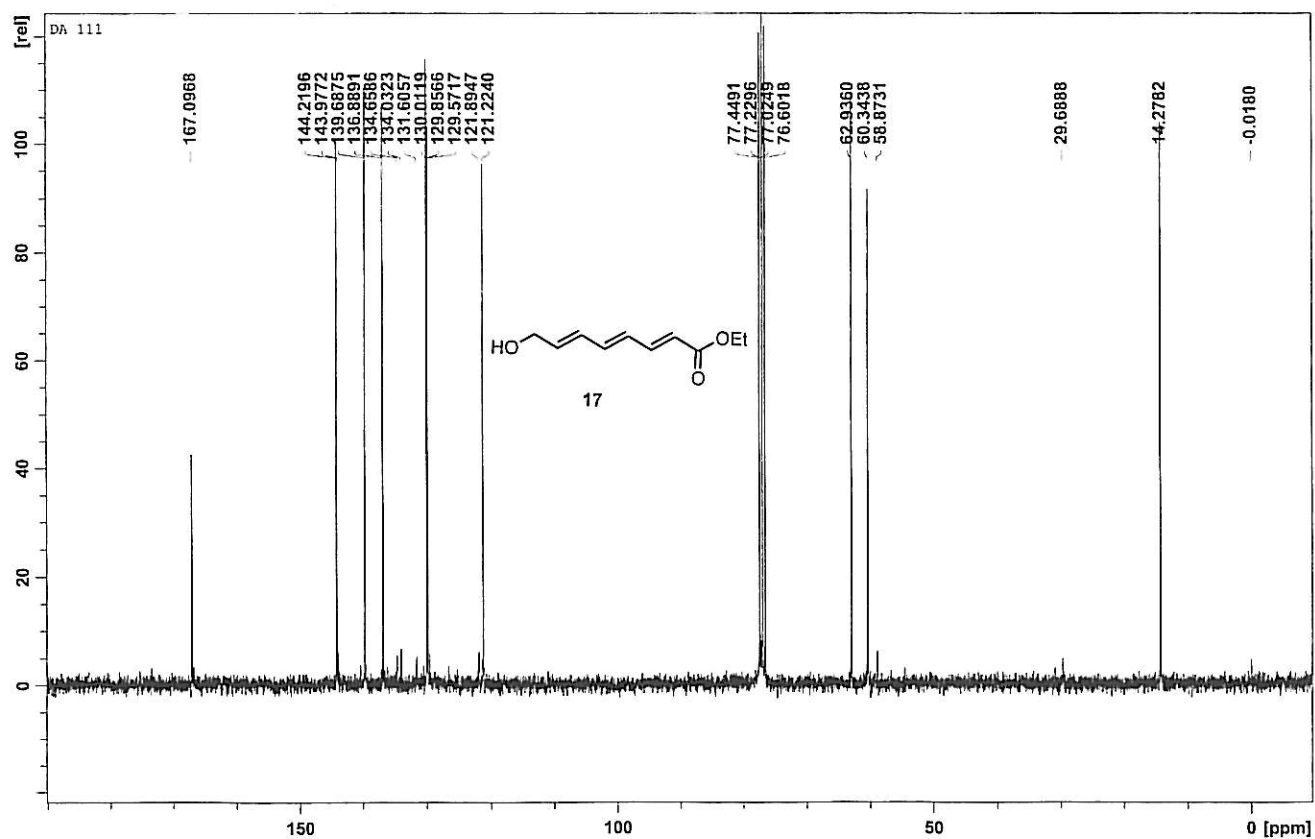

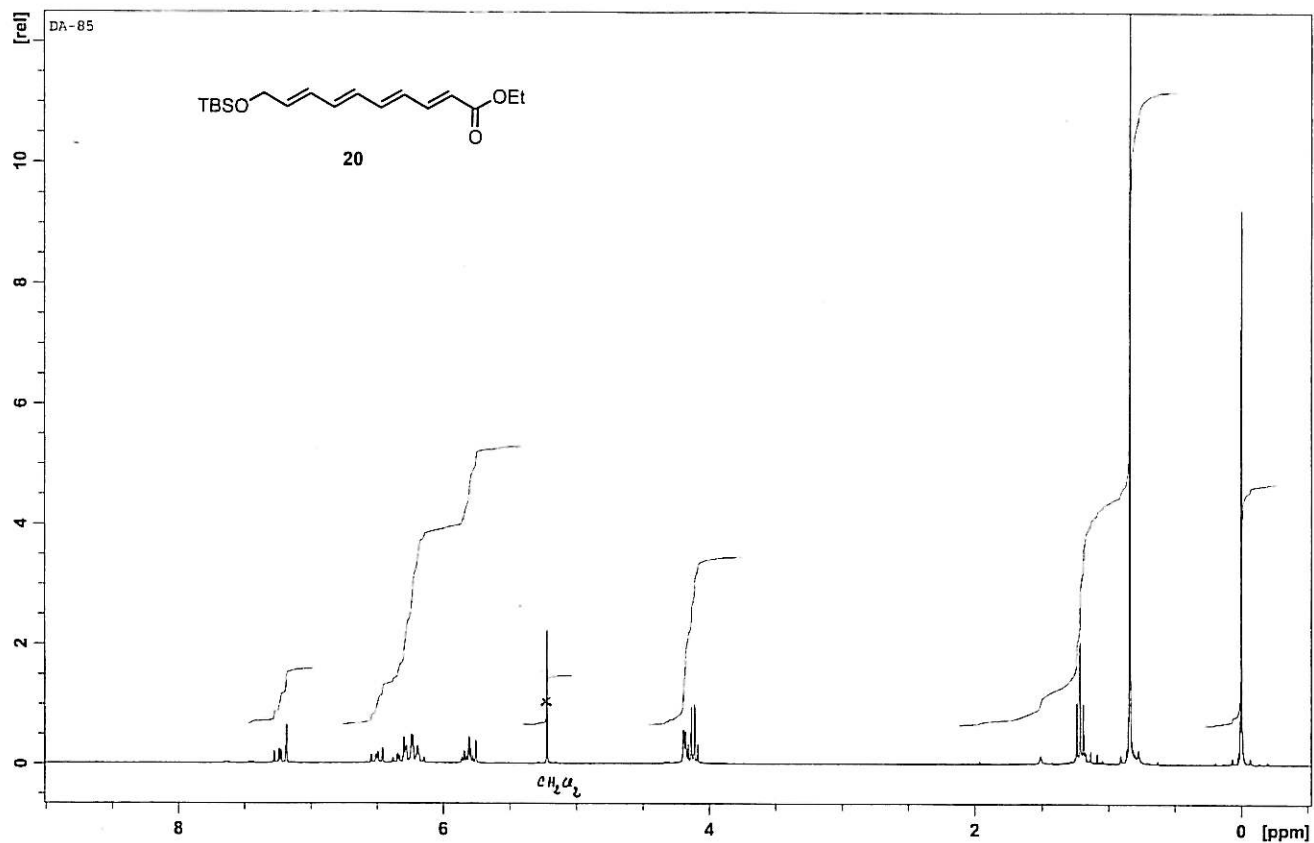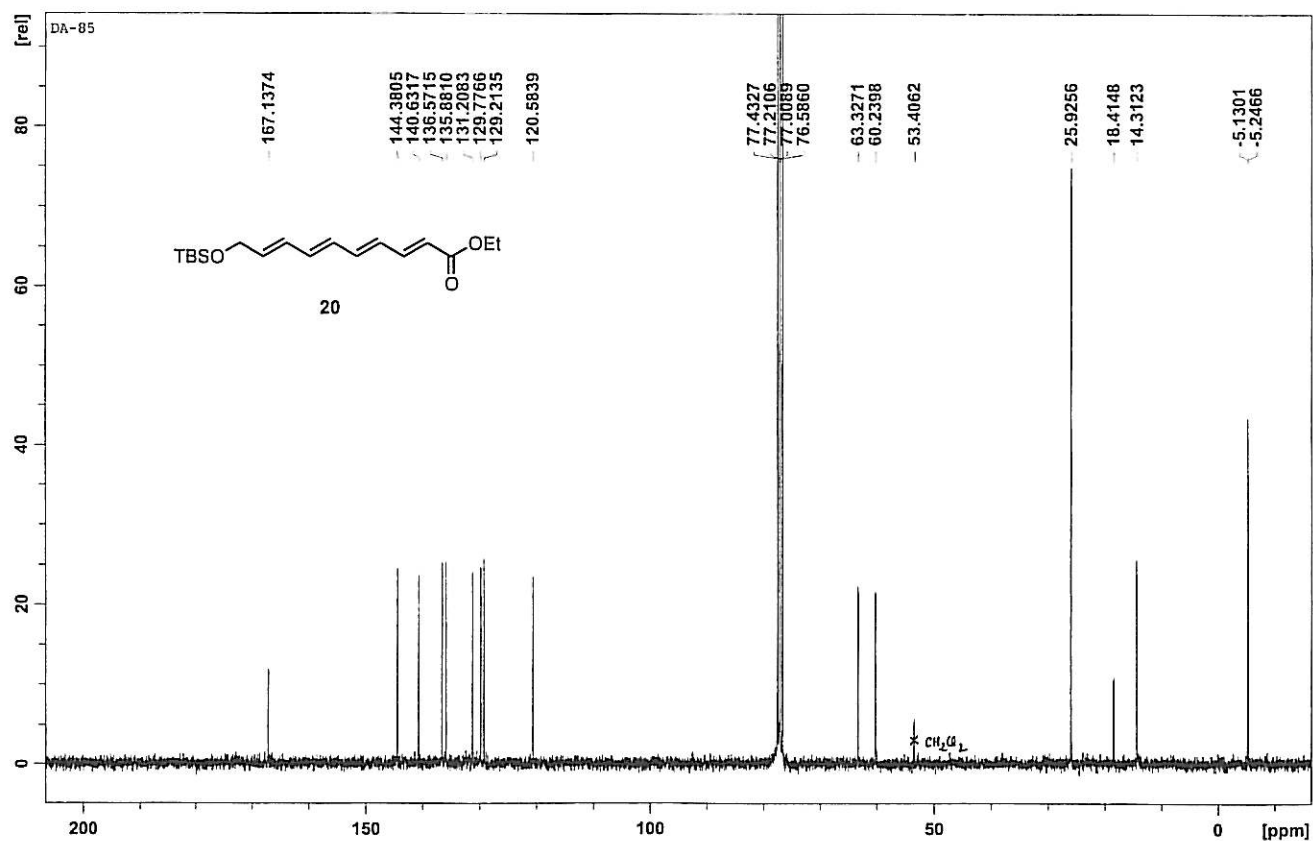

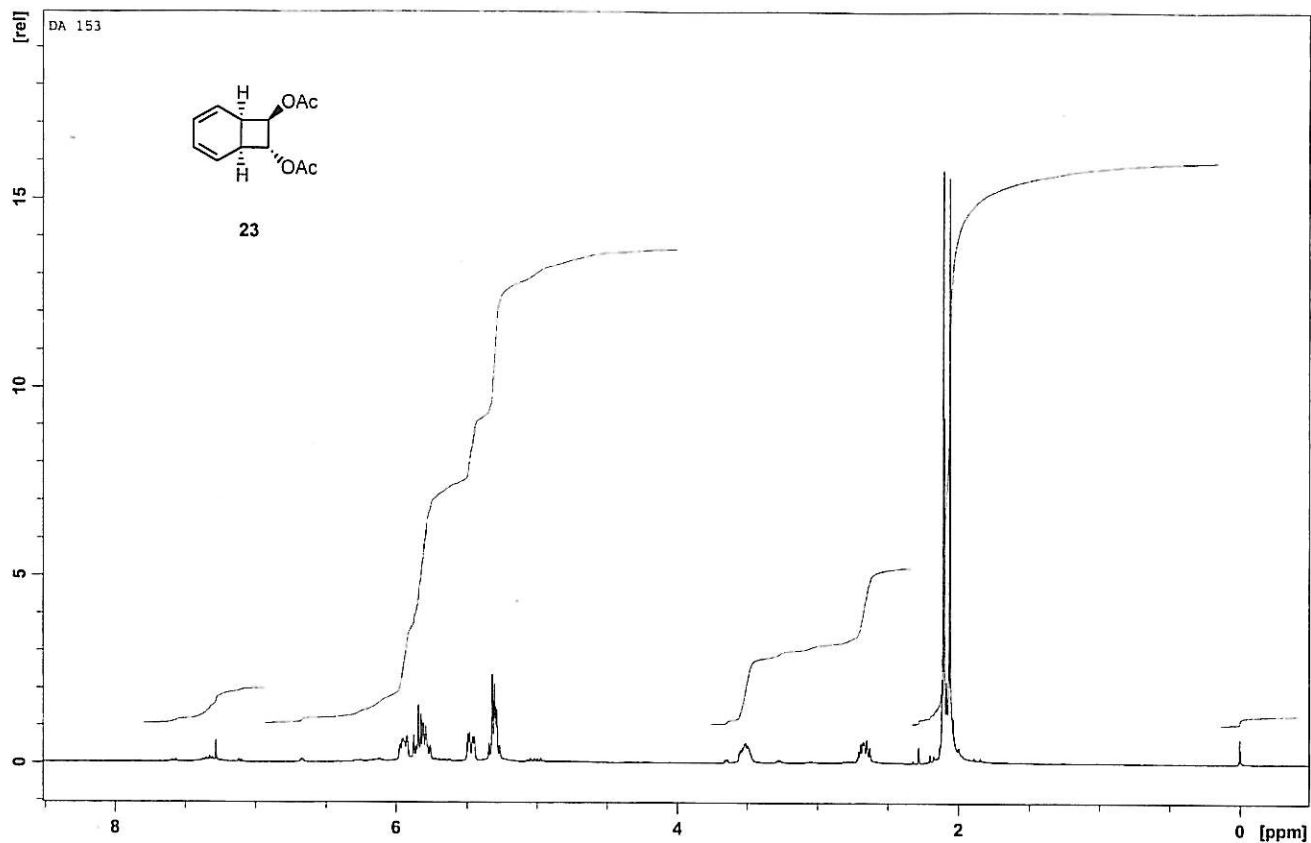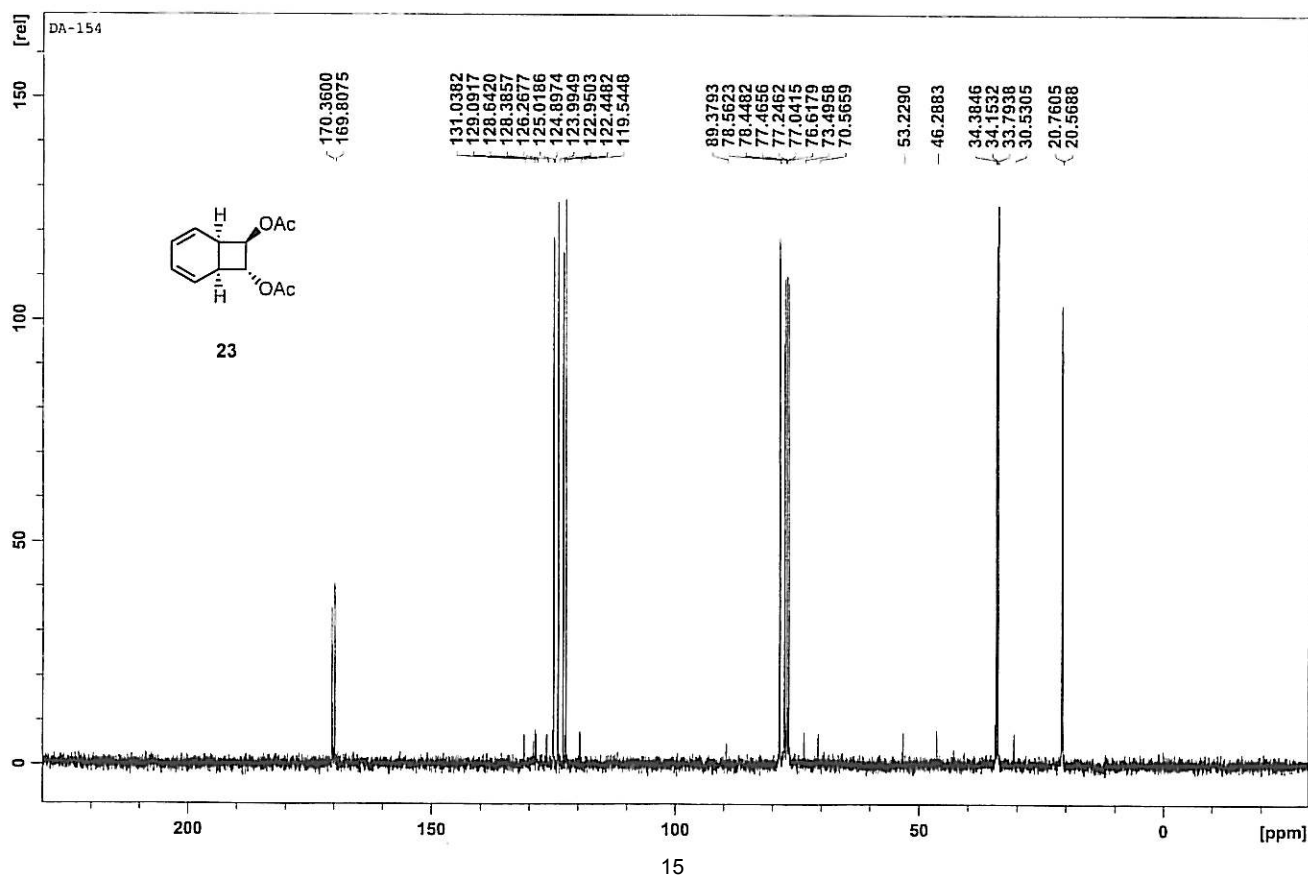

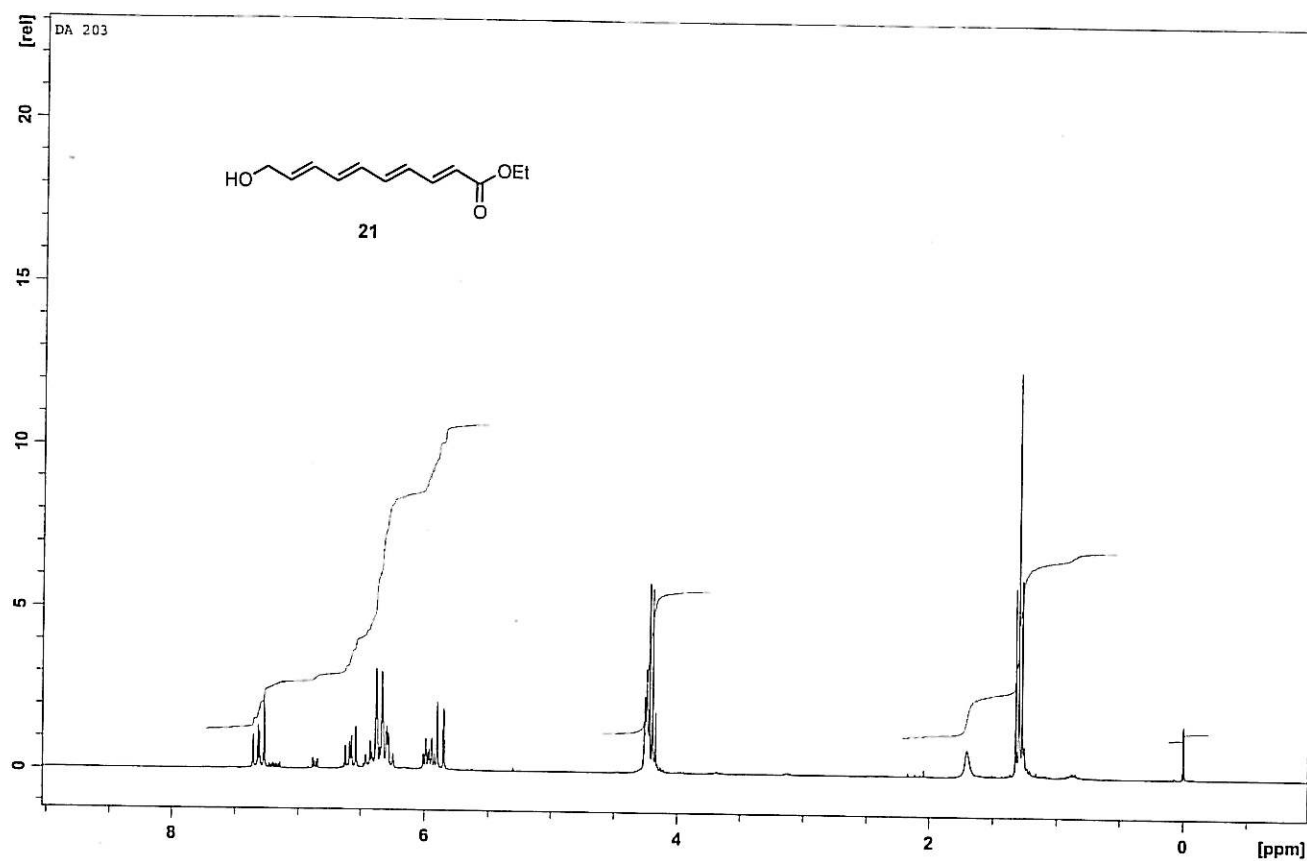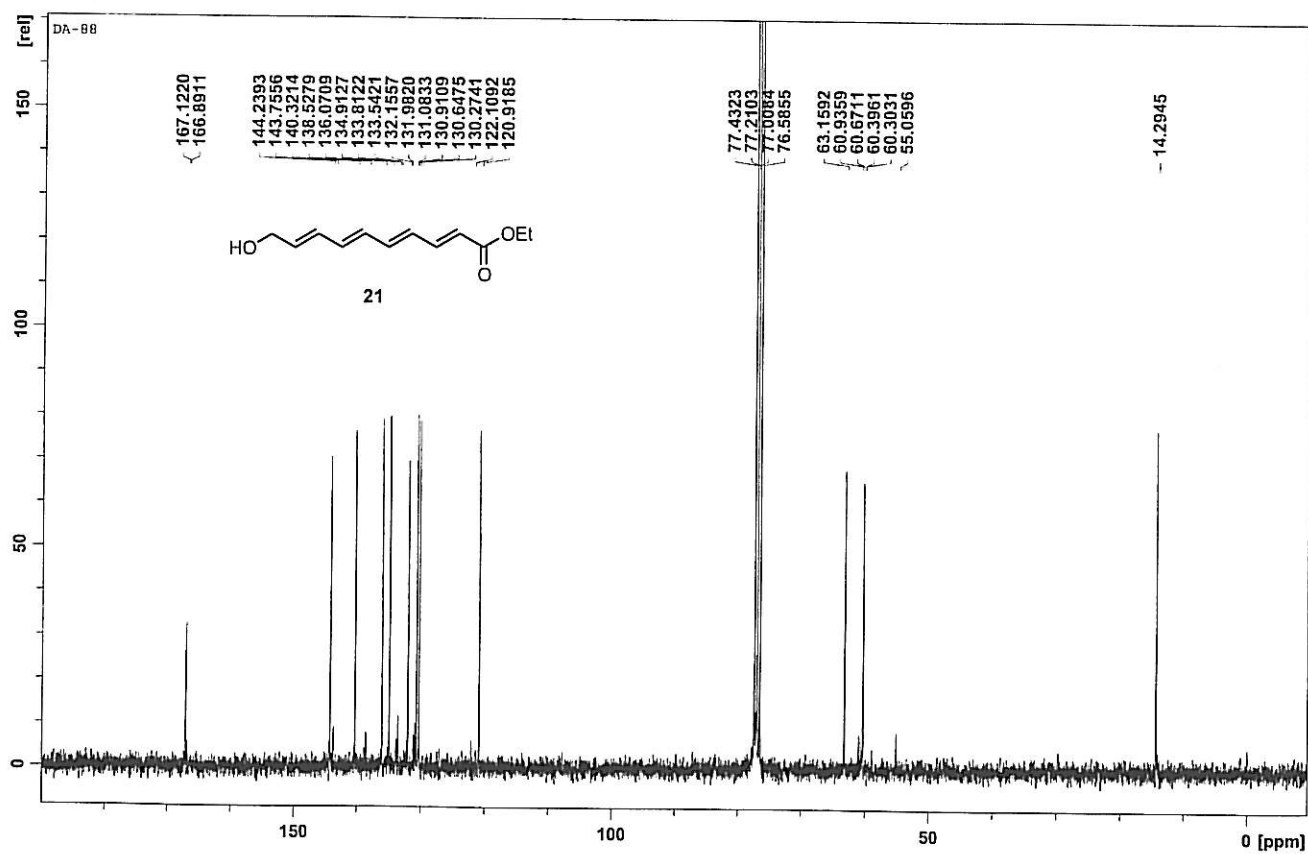



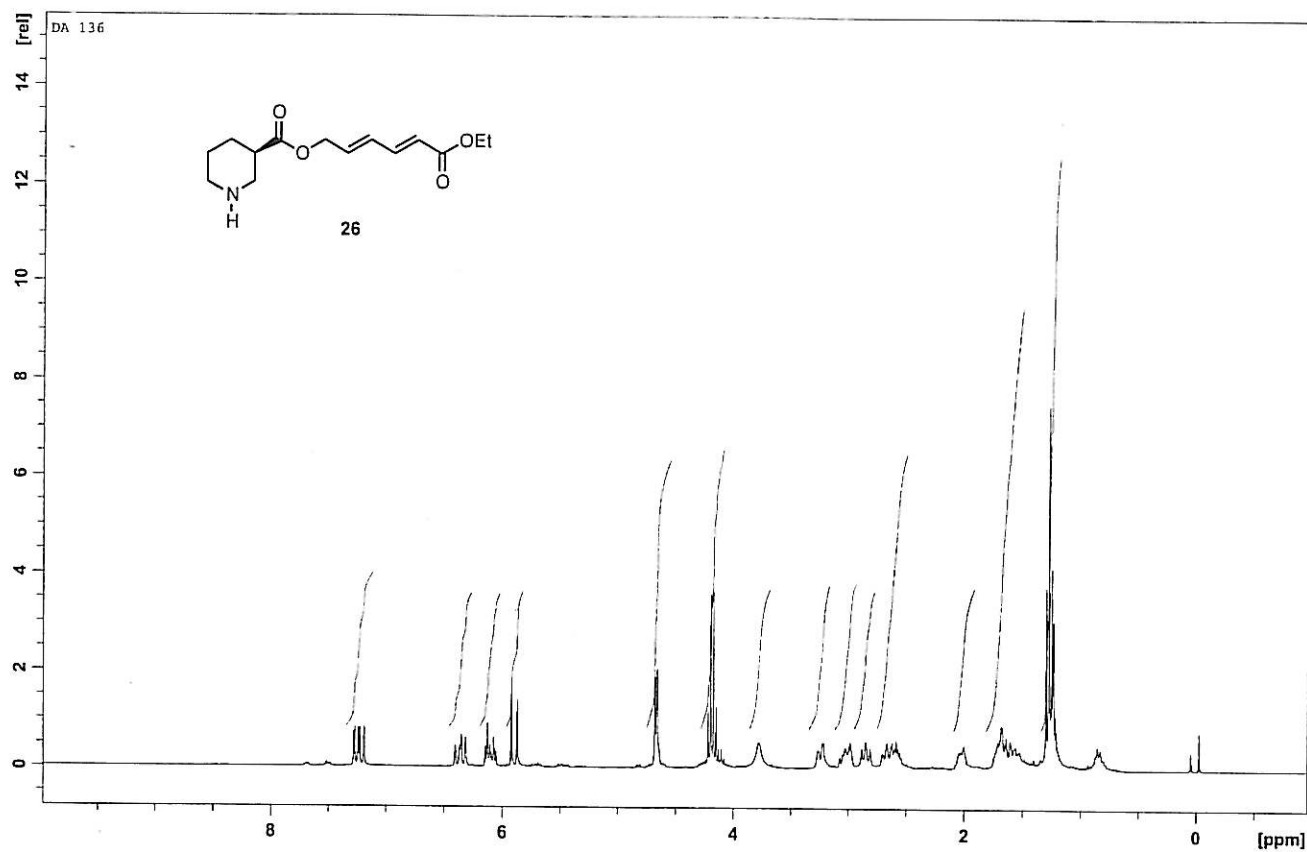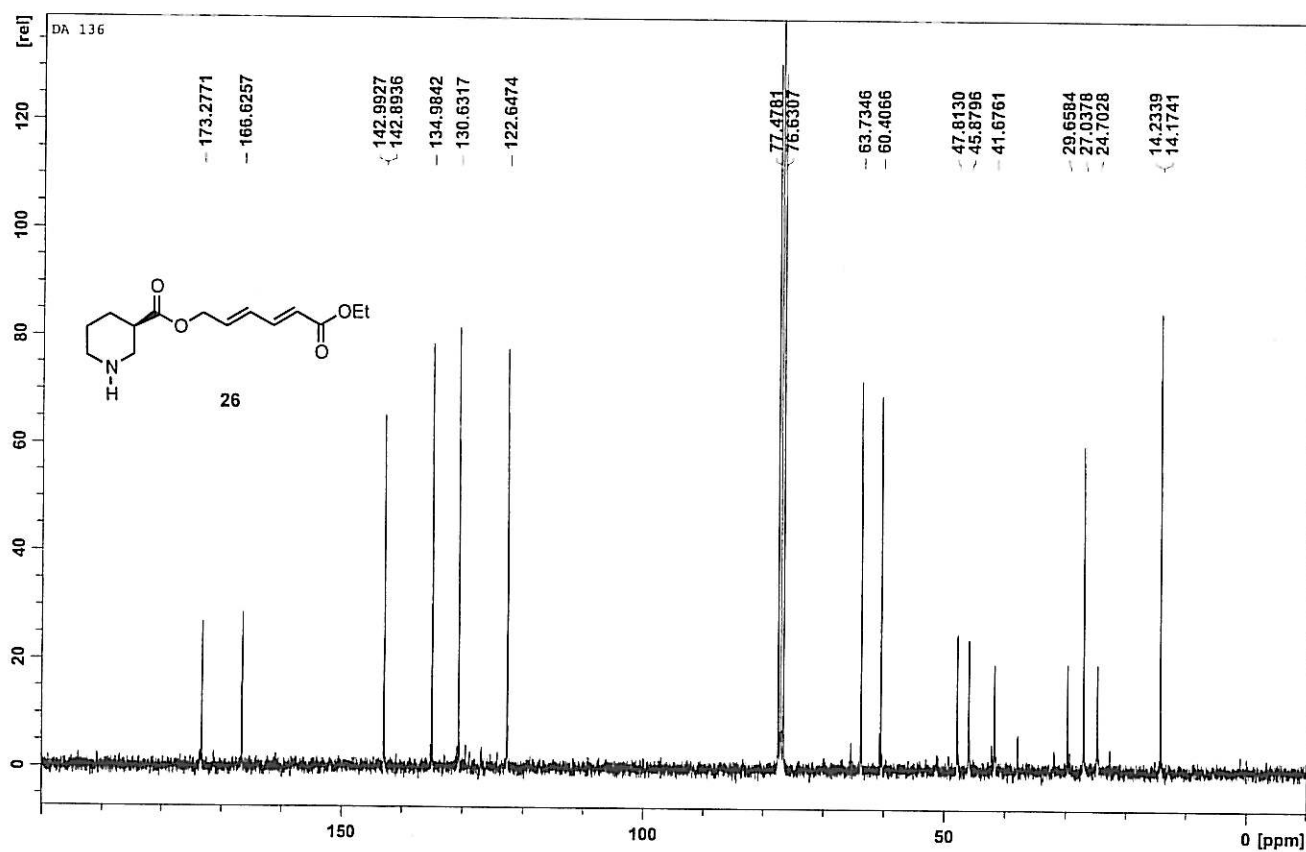

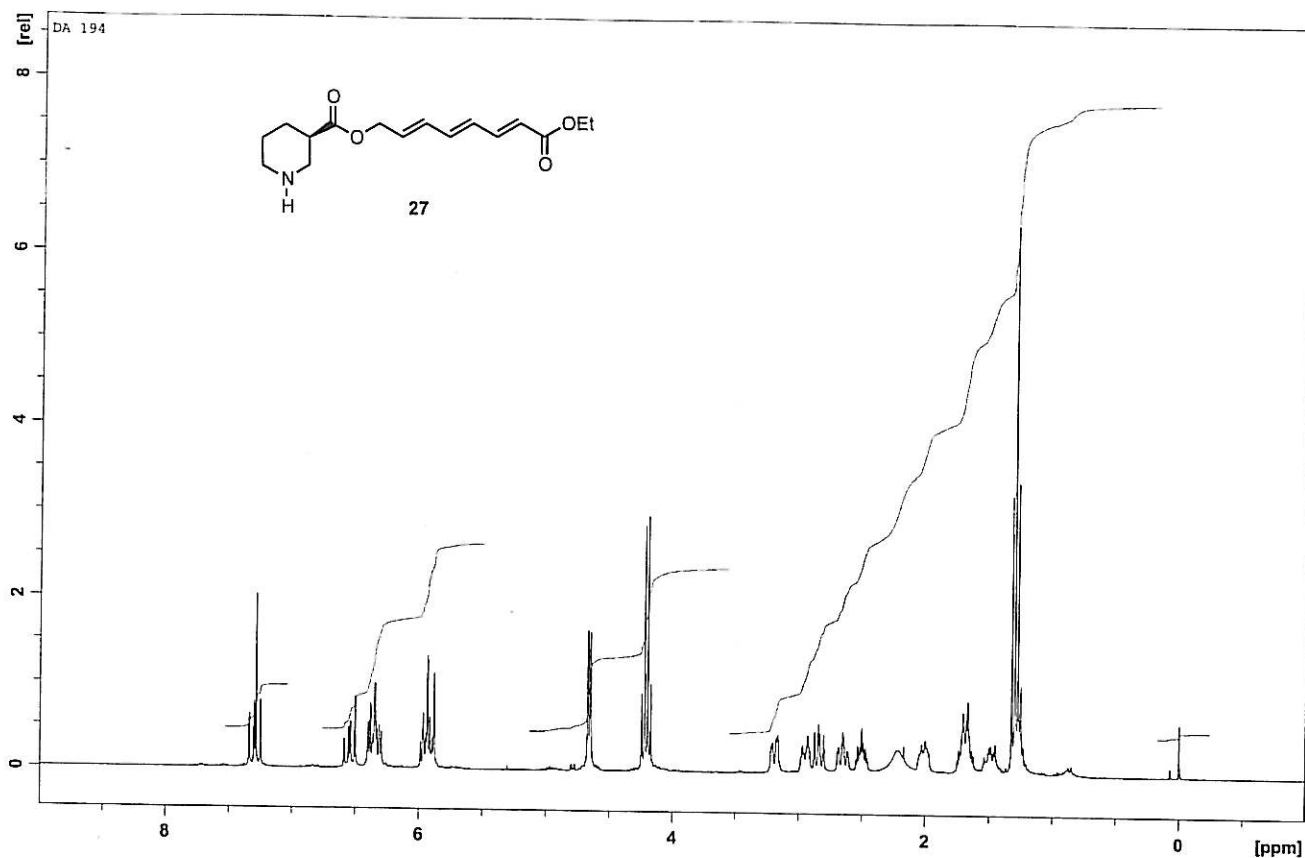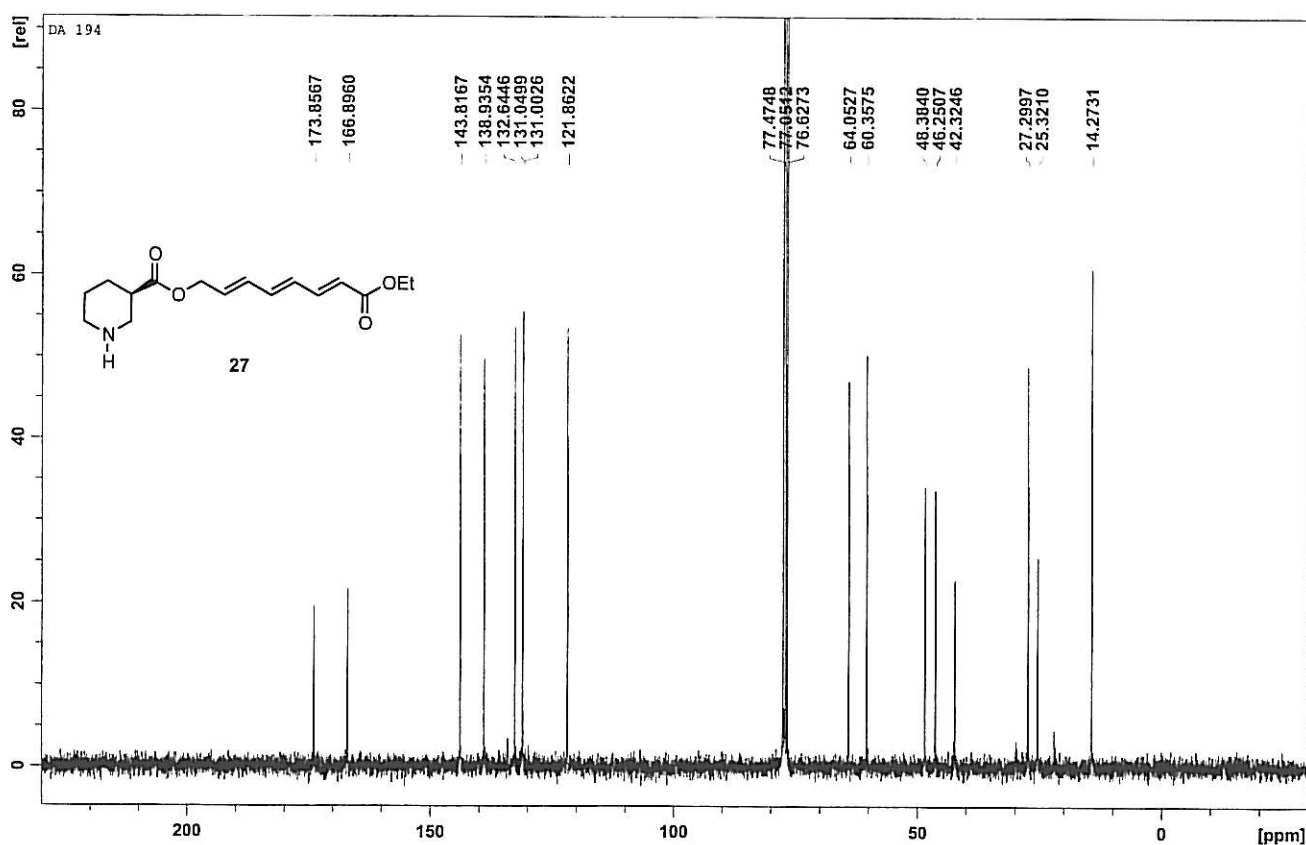

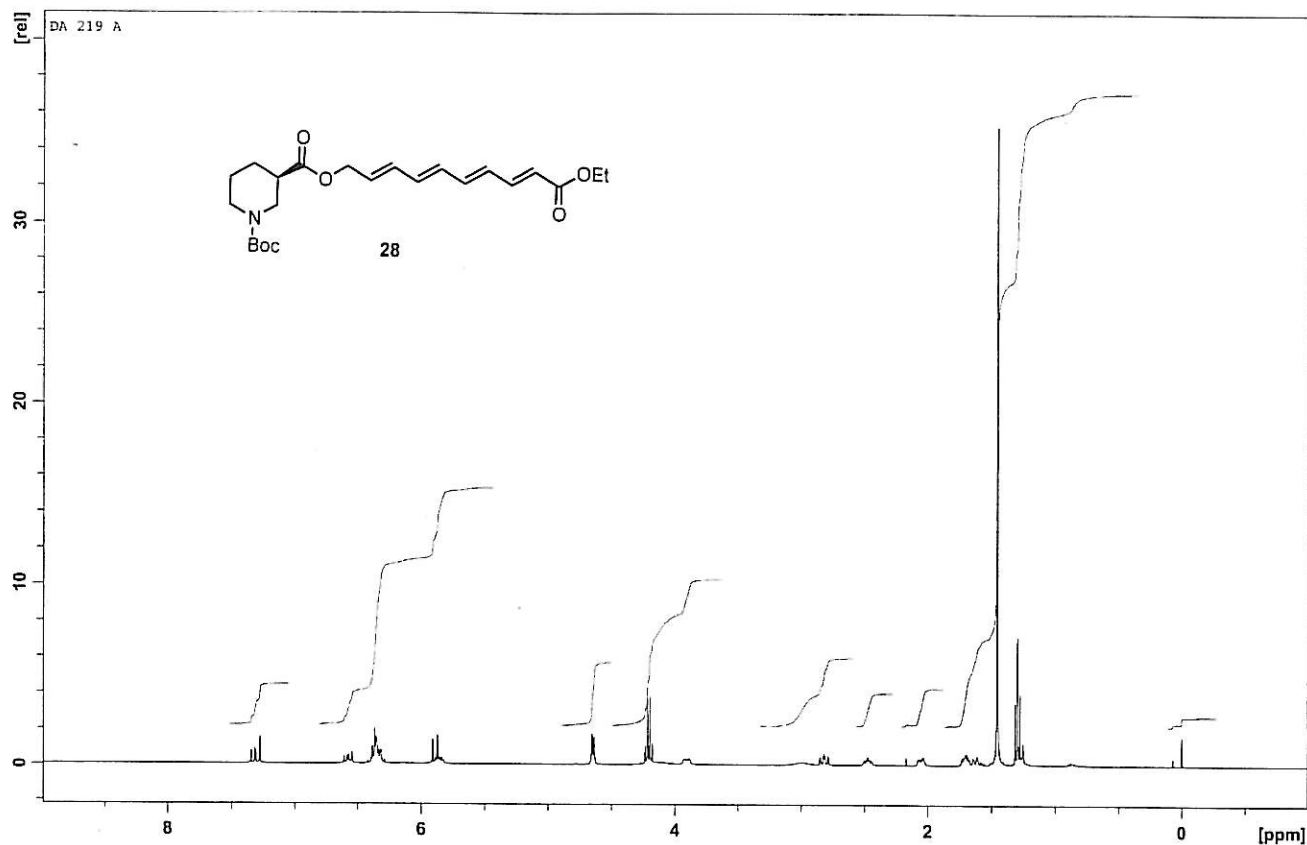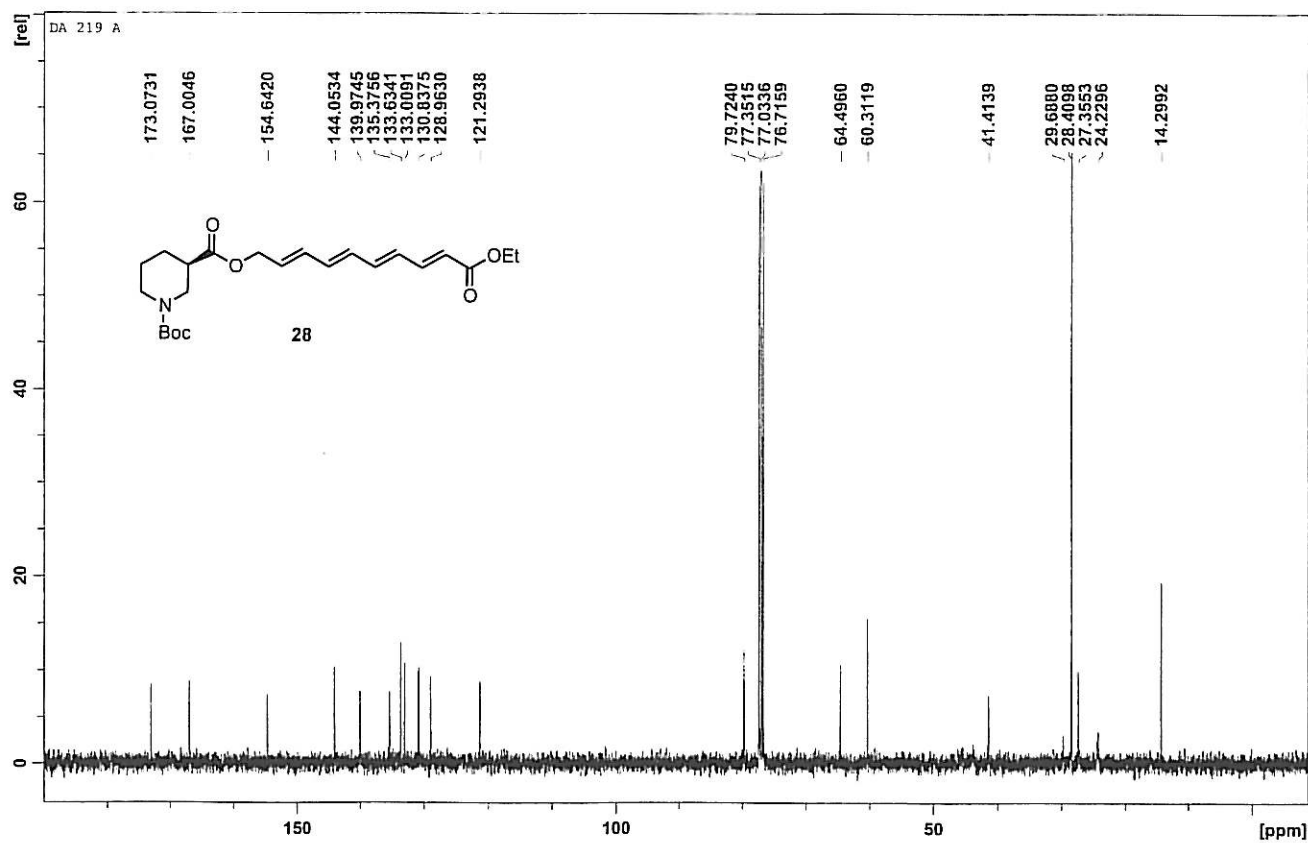

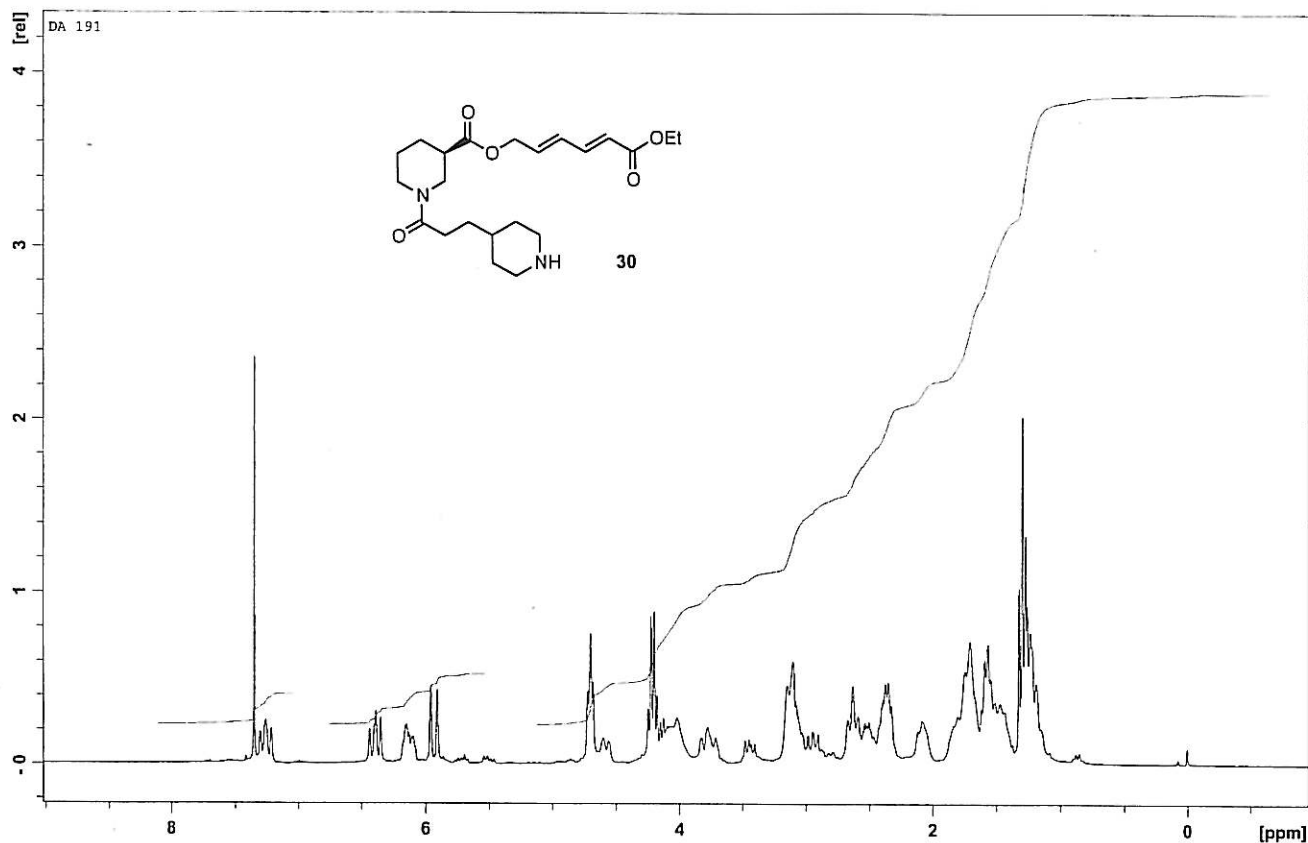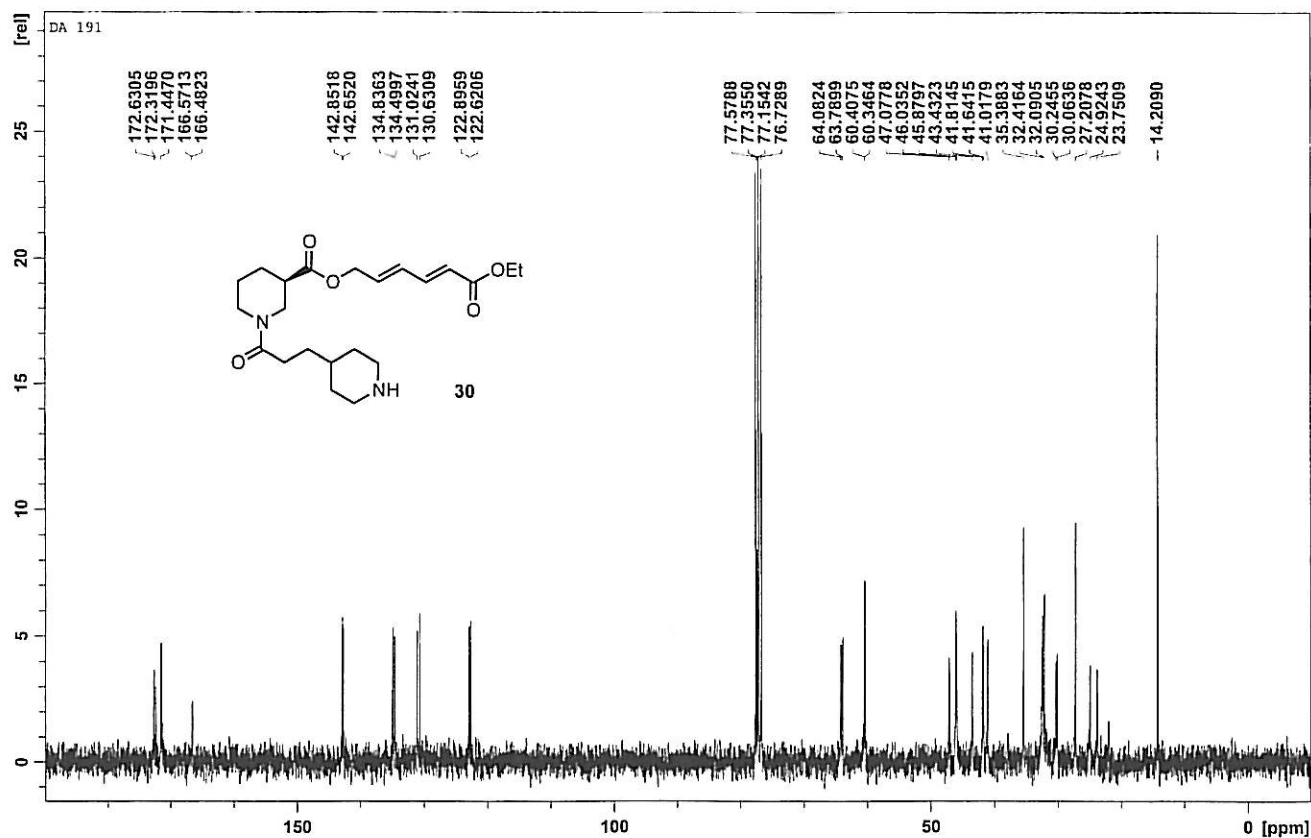

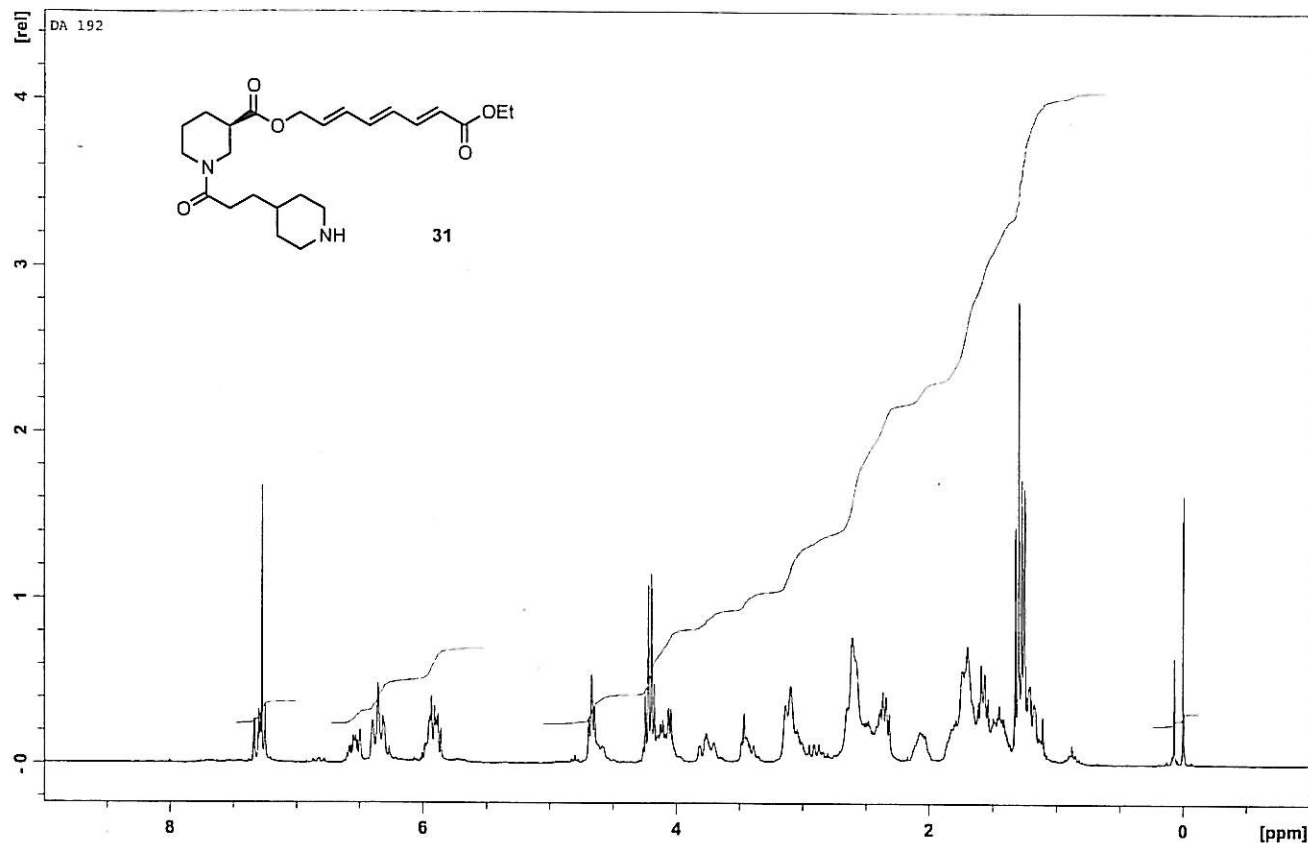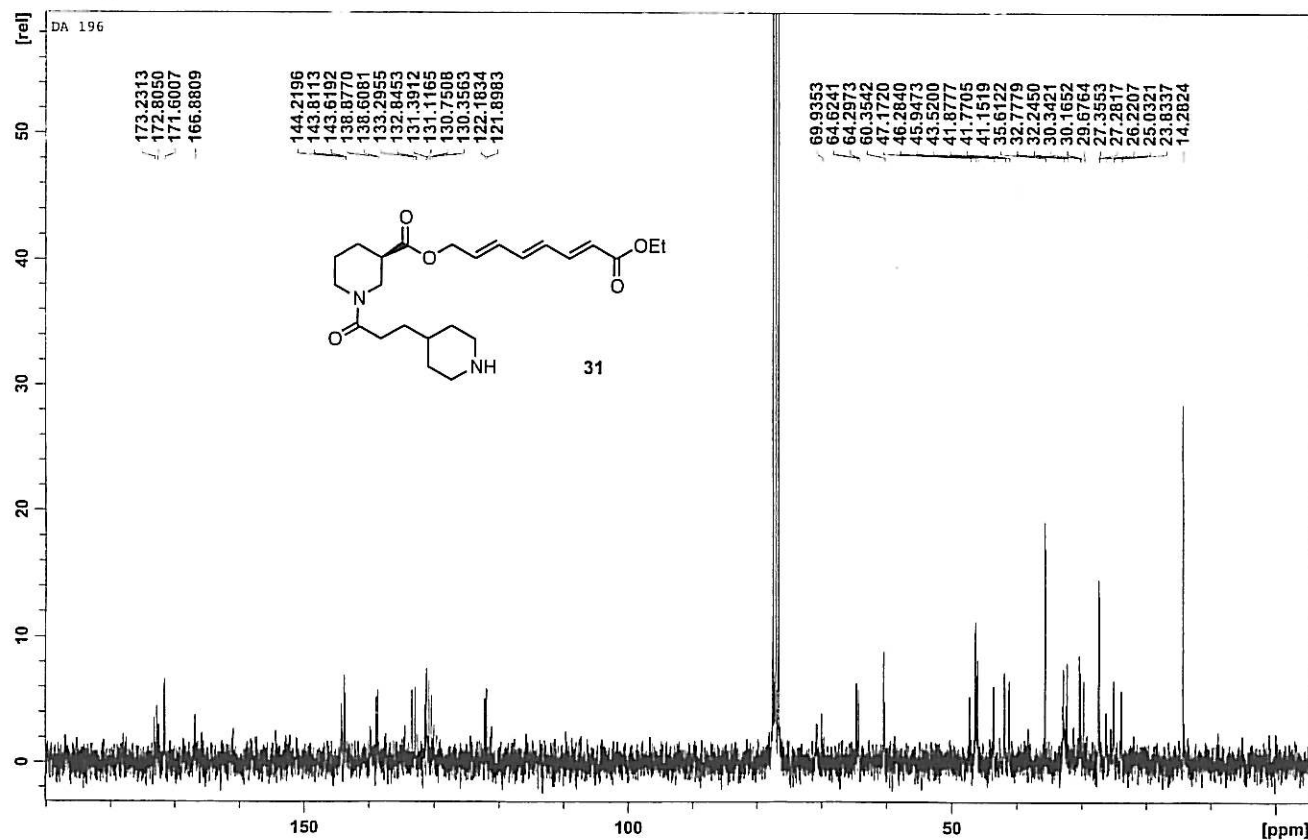

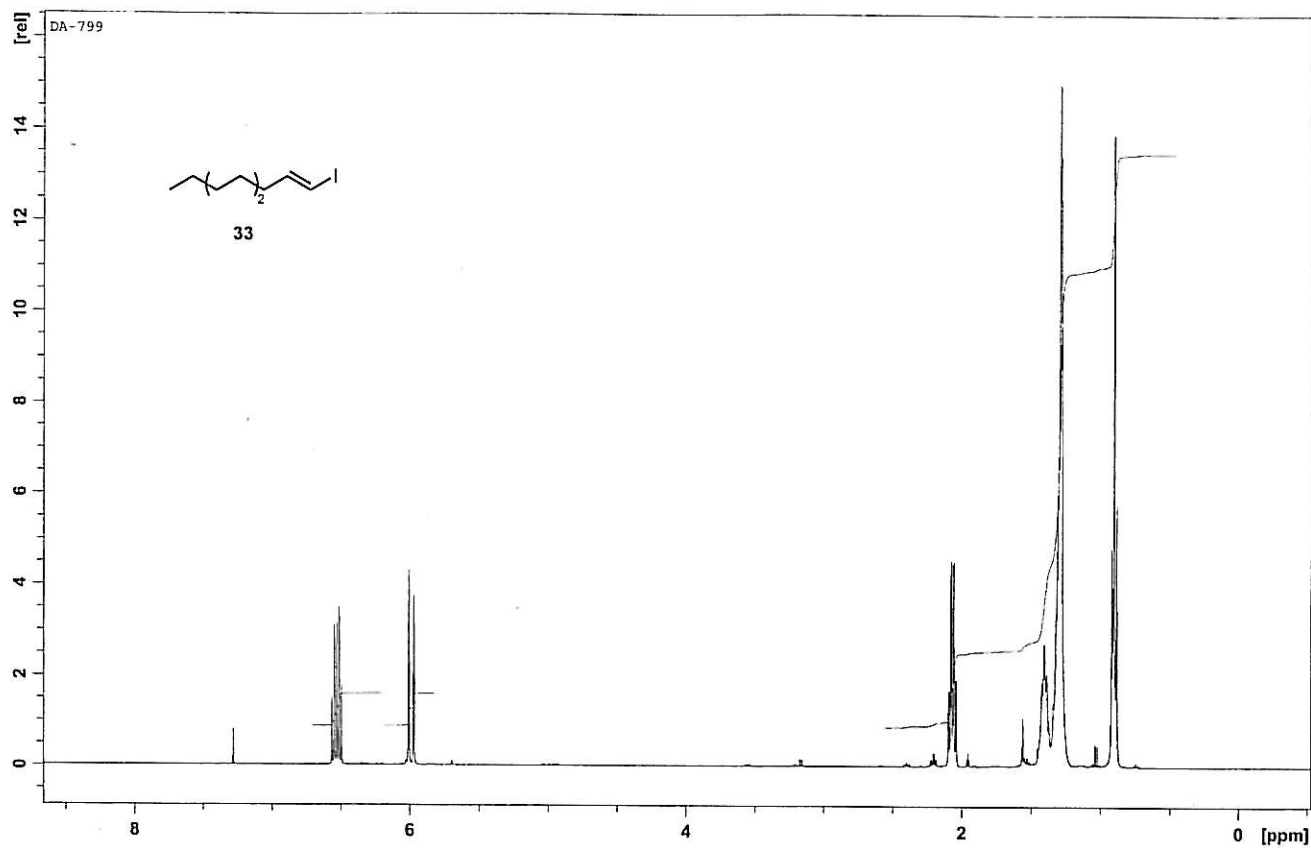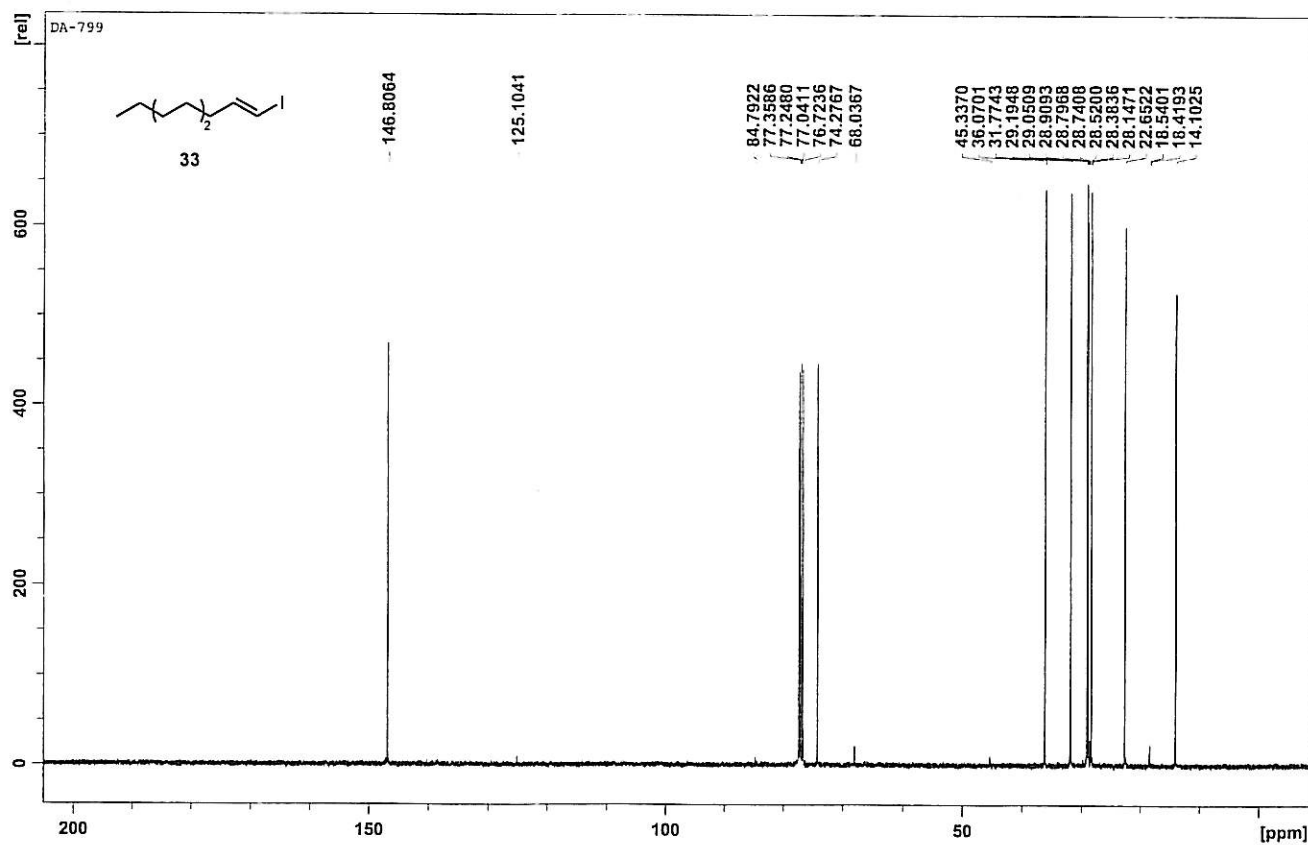

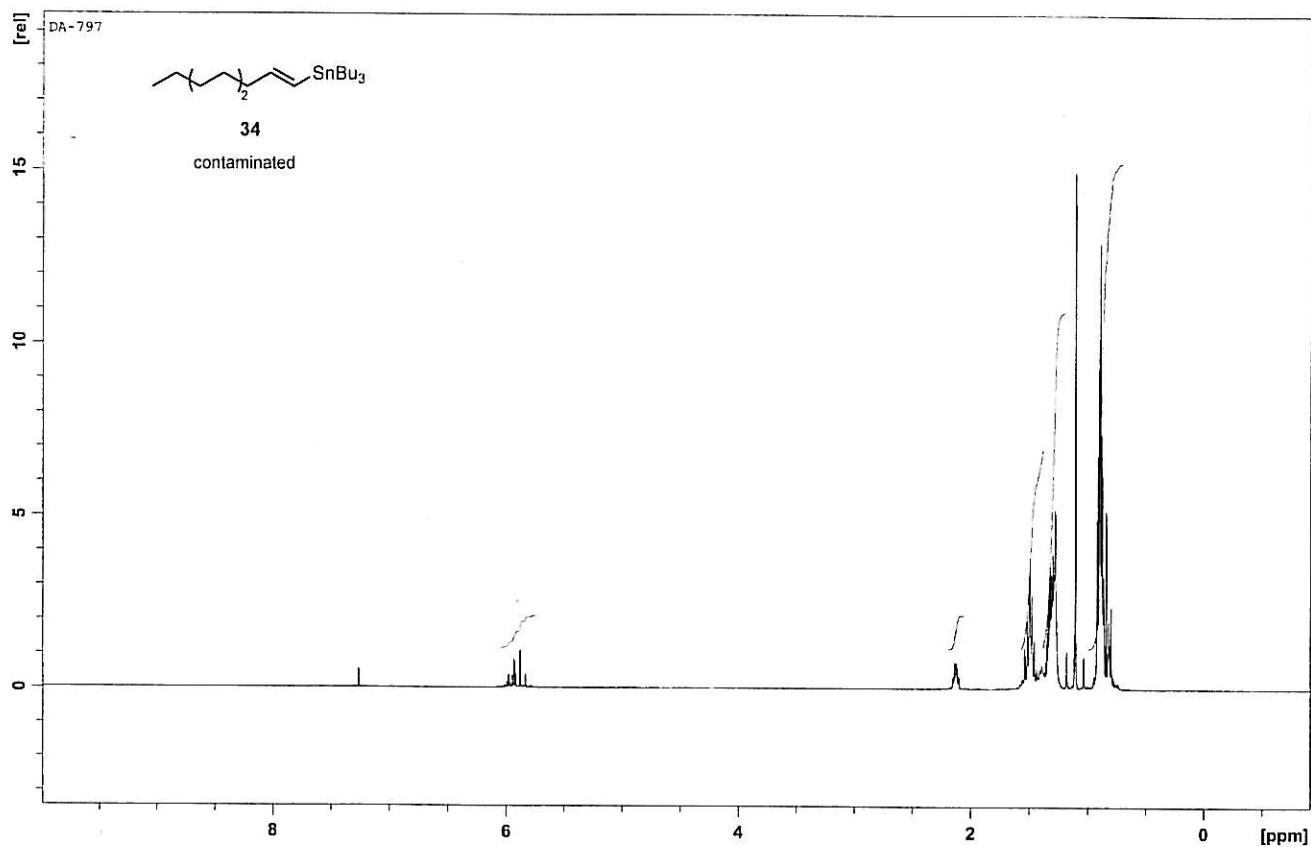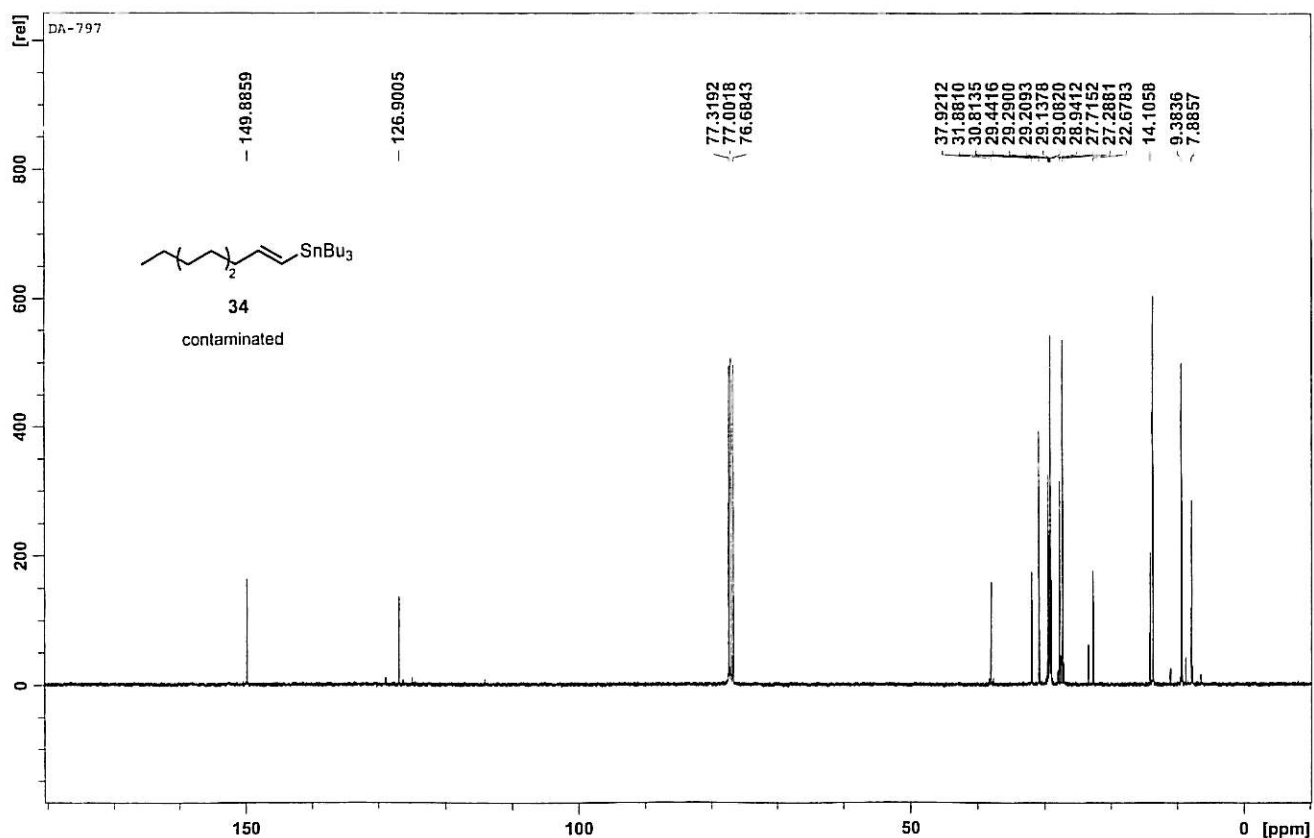



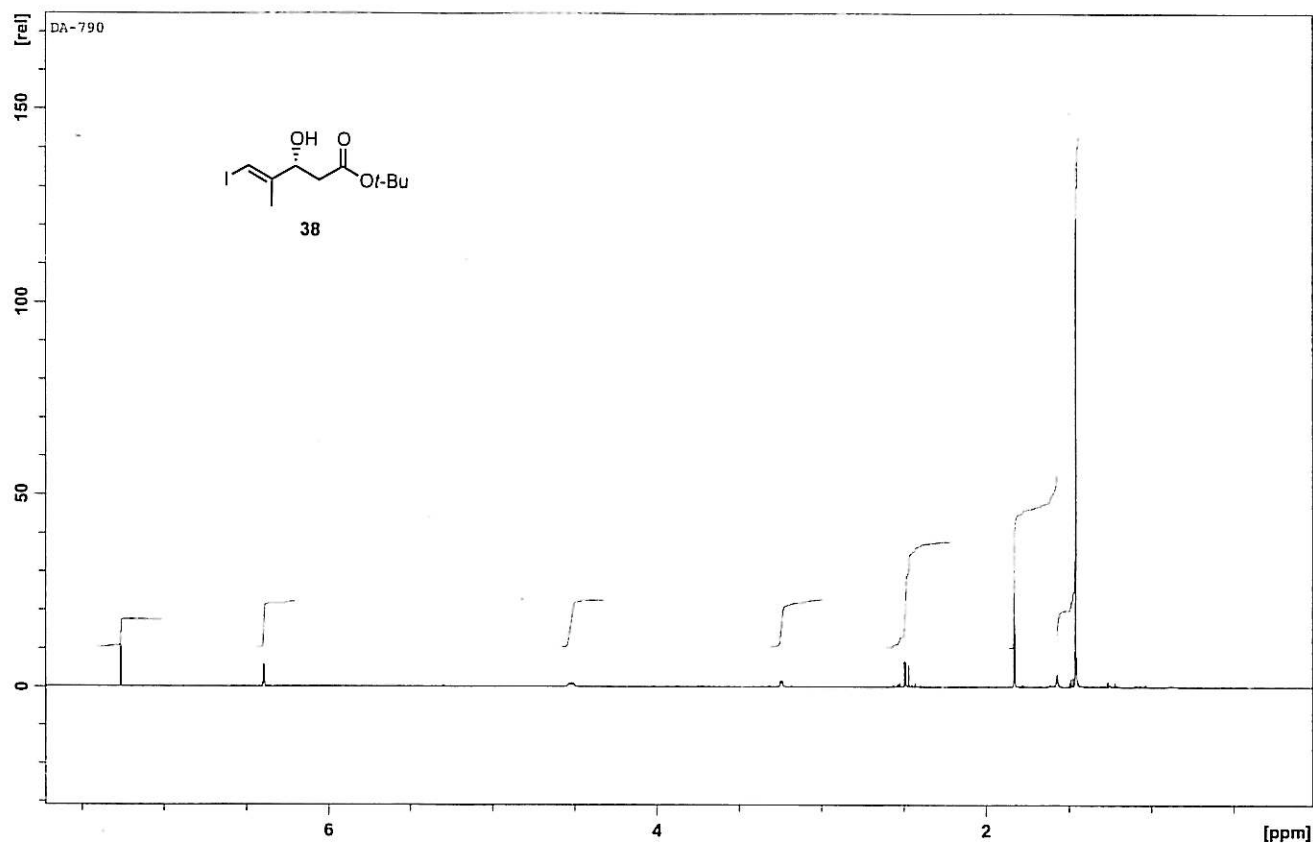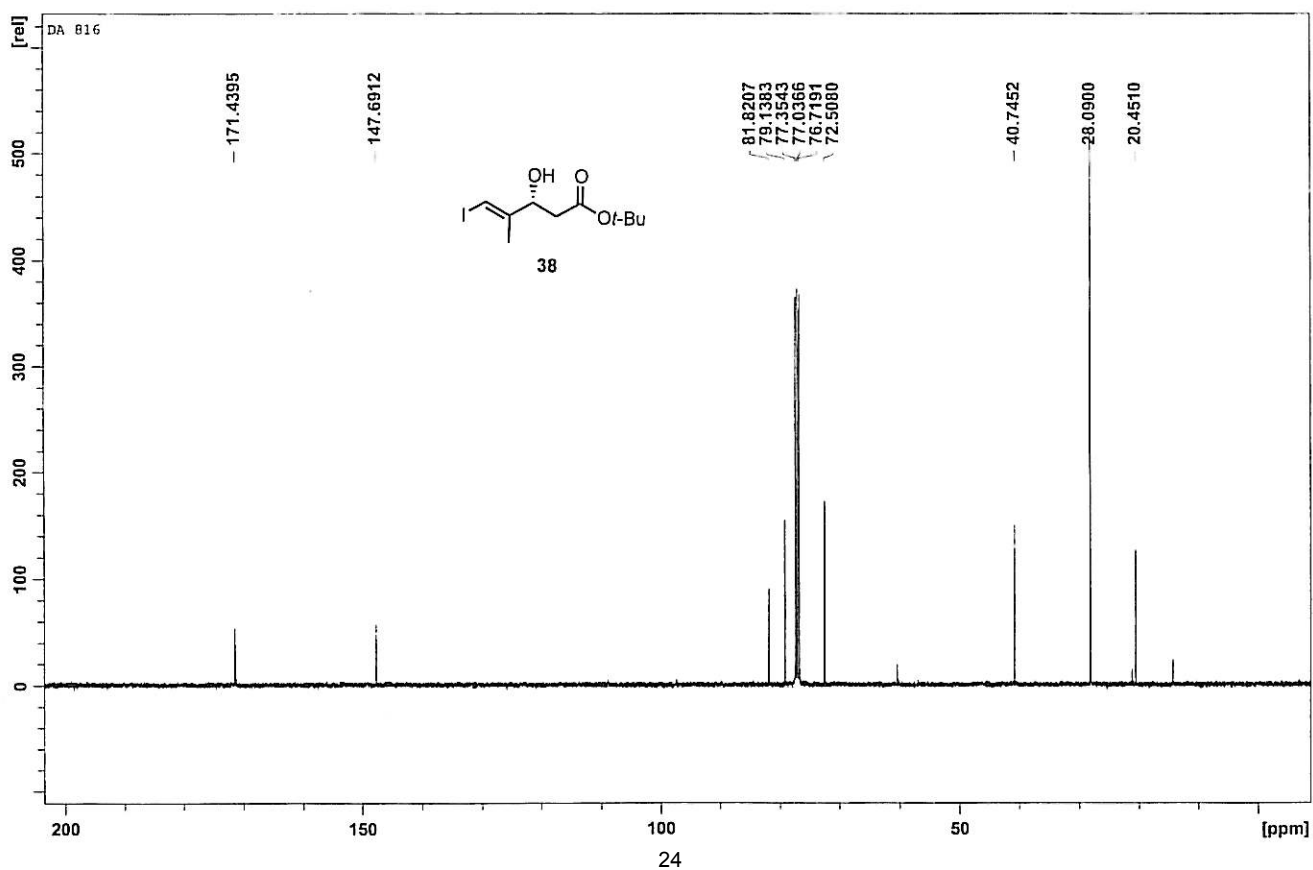



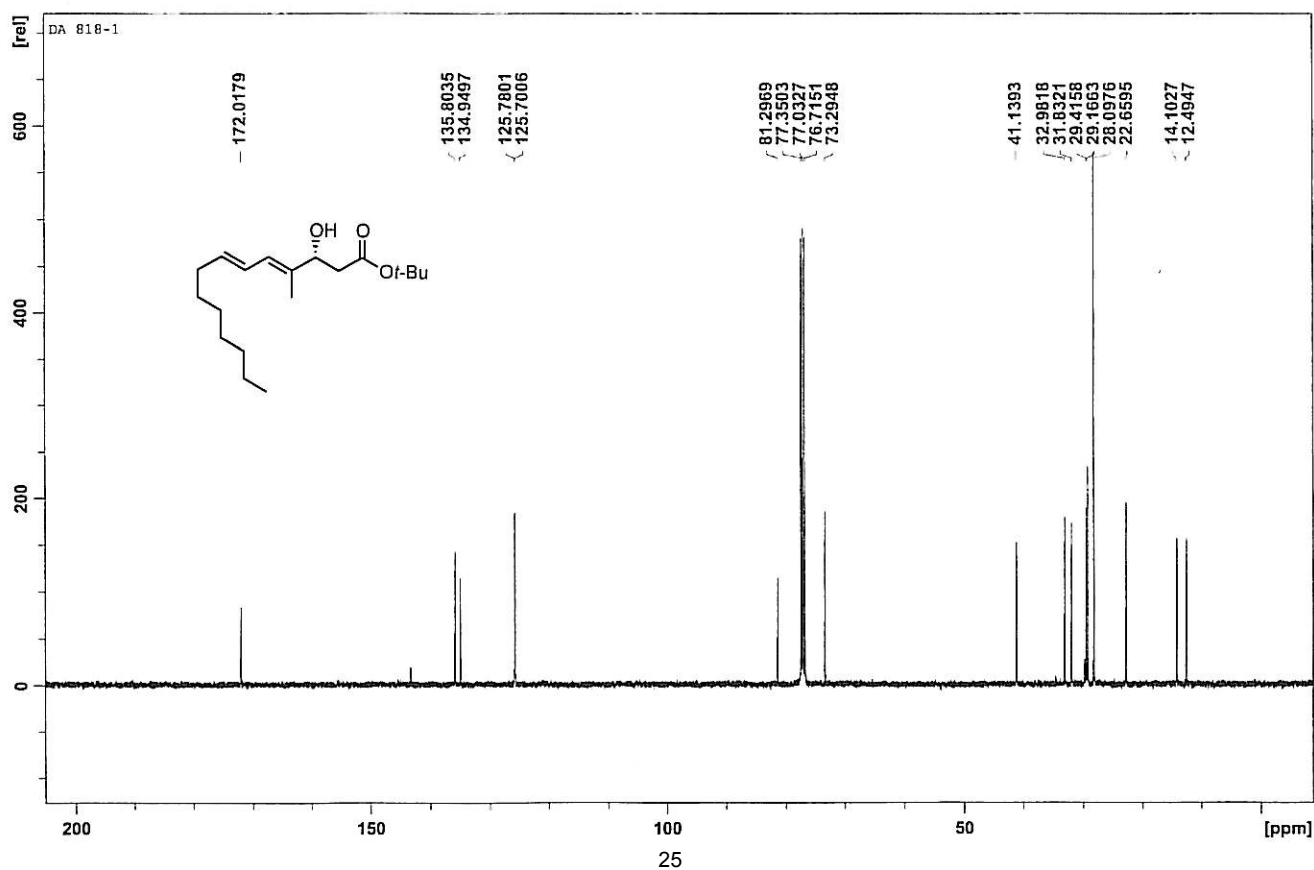

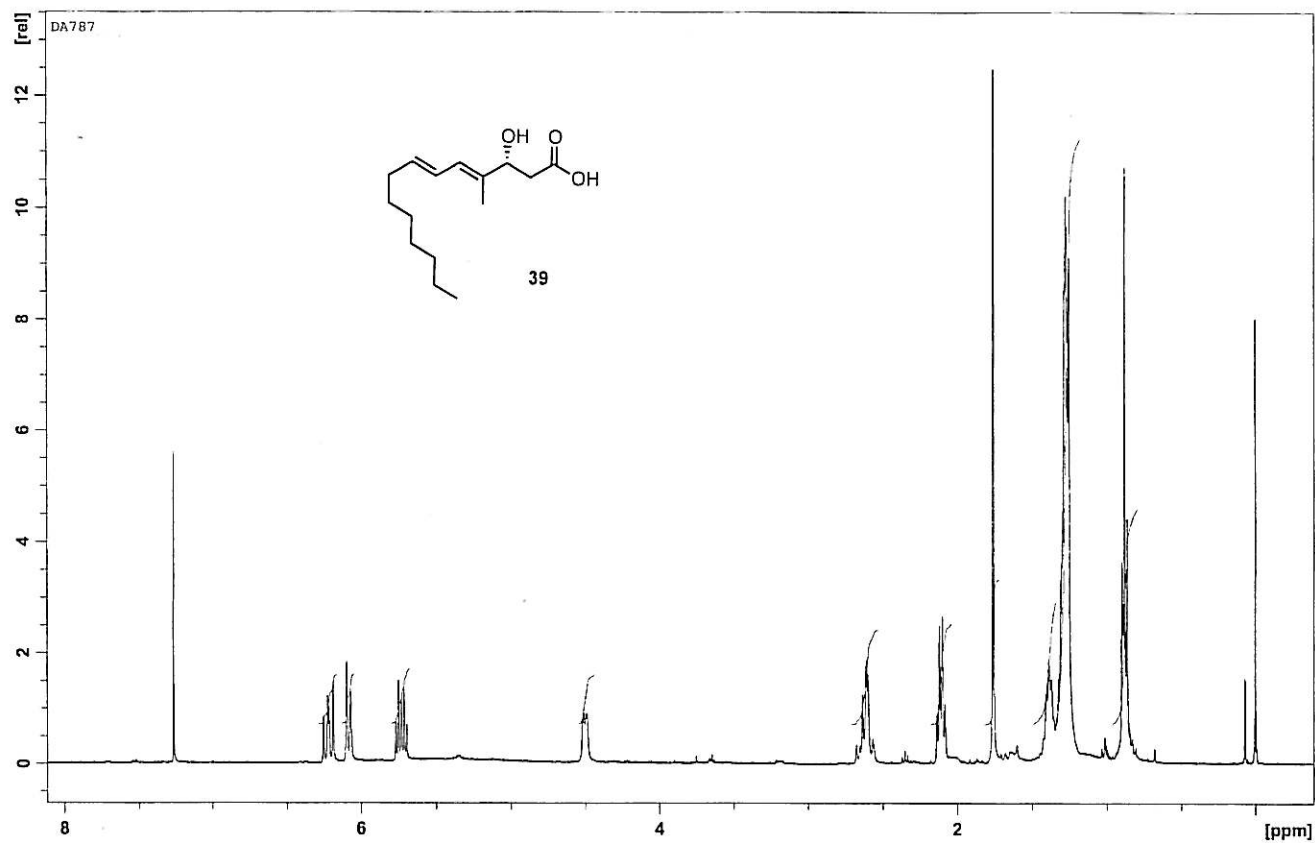

Supplement: c2ob25593f.pdf [file c2ob25593f.pdf]
